# Supplementary material for: Enantioselective direct aldol reaction of α-keto esters catalyzed by (Sa)-binam-d-prolinamide under quasi solvent-free conditions
Source: Royal Society of Chemistry journal article supplement (doi:10.1039/c2ob25224d), 2012-01-01
Supplement: c2ob25224d.pdf [file c2ob25224d.pdf]

Supporting Information for

**Highly Efficient Enantioselective Direct Aldol Reaction of  $\alpha$ -Keto Esters Catalyzed by (*S*)-  
Binam-D-prolinamide under *quasi* Solvent-free Conditions.**

*Santiago F. Vióquez,<sup>a</sup> Abraham Bañón-Caballero,<sup>a</sup> Gabriela Guillena,<sup>\*a</sup> Carmen Nájera,<sup>\*a</sup> Enrique  
Gómez-Bengo, <sup>\*b</sup>*

*<sup>a</sup>. Dpto. Química Orgánica and Instituto de Síntesis Orgánica, Universidad de Alicante, Apdo. 99, E-03080 Alicante, Spain. <sup>b</sup>. Departamento de Química Orgánica I, Universidad del País Vasco, Apdo.1072, 20080 San Sebastián, Spain.*

*[gabriela.guillena@ua.es](mailto:gabriela.guillena@ua.es), [cnajera@ua.es](mailto:cnajera@ua.es), [enrique.gomez@ehu.es](mailto:enrique.gomez@ehu.es)*

**Table of Contents:**

|                                                |     |
|------------------------------------------------|-----|
| General information.....                       | S2  |
| Description of catalysts .....                 | S2  |
| General procedure for the aldol reaction ..... | S2  |
| Optimization of reaction conditions .....      | S3  |
| Spectra and HPLC data for aldol products ..... | S4  |
| NMR spectra for aldol products .....           | S7  |
| HPLC chromatograms for aldol products.....     | S17 |
| Computational Methods .....                    | S28 |
| References .....                               | S47 |

**General Information:** Catalysts **1a-c** were prepared following the described procedures.<sup>1a,b</sup> Dry DMF, dry toluene, dry CH<sub>2</sub>Cl<sub>2</sub>, piperidine and triethylamine and all others reagents were commercially available and used without further purification. Only the structural most important peaks of the IR spectra (recorded on a Nicolet Impact 400D) are listed. <sup>1</sup>H NMR (300 MHz, 400 MHz) and <sup>13</sup>C NMR (75 MHz) spectra were obtained on a Bruker AC-300 using CDCl<sub>3</sub> as solvent and TMS as internal standard, unless otherwise stated. Optical rotations were measured on a Perkin Elmer 341 polarimeter. HPLC analyses were performed on a Agilent 1100 series equipped with a chiral column (detailed for each compound below), using mixtures of n-hexane/isopropyl alcohol (IPA) as mobile phase, at 25 °C. GC analyses were performed on a Agilent 7802A series equipped with a chiral column (detailed for each compound below). Analytical TLC was performed on Schleicher & Schuell F1400/LS silica gel plates and the spots were visualised under UV light (λ=254 nm). For flash chromatography we employed Merck silica gel 60 (0.063-0.2 mm). Elemental analysis was carried out in the Research Technical Services of the University of Alicante.

#### Description of catalyst:

##### (S<sub>a</sub>)-BINAM-D-Pro (**1b**):

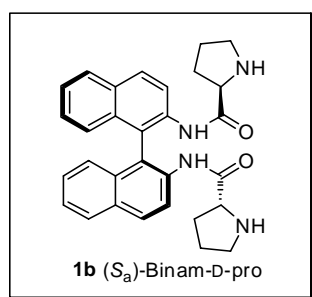

Pale yellow solid;  $[\alpha]_D^{29} = +60.7$  (c 1, MeOH); Mp 120 °C (CHCl<sub>3</sub>, Et<sub>2</sub>O);  $R_f = 0.21$  (EtOAc/MeOH 1:1); IR (KBr):  $\nu$  3466, 3345, 3203, 3055, 2970, 1668, 1591 cm<sup>-1</sup>; <sup>1</sup>H NMR (300 MHz, CDCl<sub>3</sub>):  $\delta$  1.19-1.38 (m, 2H), 1.42-1.56 (m, 2H), 1.66-1.80 (m, 2H), 1.86-1.99 (m, 2H), 2.48-2.66 (m, 2H), 6.90 (d, J = 8.2 Hz, 1H), 7.12-7.45 (m, 6H), 7.71 (d, J = 8.5 Hz, 1H), 7.83 (d, J = 8.8 Hz, 1H), 7.92 (d, J = 9.1, 1H), 7.99 (d, 1H, J = 9.0 Hz), 8.82 (d, 1H, J = 8.9 Hz), 9.73 (broad s, 1H); <sup>13</sup>C NMR (75 MHz, CDCl<sub>3</sub>):  $\delta$  25.2, 25.2, 30.7, 46.2, 60.7, 111.4, 118.1, 119.9, 120.2, 122.5, 123.6, 124.8, 125.1, 126.8, 126.9, 128.0, 128.3, 129.2, 129.9, 131.0, 132.3, 133.6, 135.2, 142.6, 173.9; HRMS (*m/z*): Calcd for C<sub>30</sub>H<sub>30</sub>N<sub>4</sub>O<sub>2</sub>: 478,2525; found:

478,2501.

#### General procedure for the aldol reaction:

To a mixture of the corresponding  $\alpha$ -ketoester **2** (0.25 mmol), catalyst (0.2 equiv.) and acid at the indicated temperature was added the corresponding ketone **3** (1.25 mmol, 5 equiv.). The reaction was stirred until the  $\alpha$ -ketoester was consumed (monitored by TLC). Then, CH<sub>2</sub>Cl<sub>2</sub> (0.5 mL) was added to the mixture and was purified by flash chromatography (hexanes/AcOEt) to yield the pure product **4**.

## Optimization of the reaction conditions

**TABLE 1.** Optimization of the reaction conditions between acetone (**2a**) and 2-phenyl-2-oxoacetate (**3a**).<sup>a</sup>

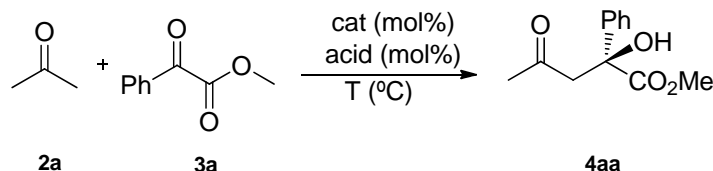

| Entry | Cat.                   | Acid (mol%)                               | Solvent (mL)                            | T (°C) | t (h) | Yield (%) <sup>b</sup> | ee (%) <sup>c</sup> |
|-------|------------------------|-------------------------------------------|-----------------------------------------|--------|-------|------------------------|---------------------|
| 1     | <b>1a</b>              | AcOH (150)                                | Acetone (0.5)                           | 25     | 17    | 90                     | 16 ( <i>R</i> )     |
| 2     | <b>1a</b>              | AcOH (150)                                | -                                       | 25     | 17    | 90                     | 15 ( <i>R</i> )     |
| 3     | <b>1a</b>              | AcOH (20)                                 | -                                       | 25     | 17    | 93                     | 4 ( <i>R</i> )      |
| 4     | <b>1a</b>              | AcOH (150)                                | -                                       | 0      | 24    | 95                     | 32 ( <i>R</i> )     |
| 5     | <i>ent</i> - <b>1a</b> | AcOH (150)                                | -                                       | 0      | 24    | 98                     | 36 ( <i>S</i> )     |
| 6     | <b>1b</b>              | AcOH (150)                                | -                                       | 0      | 48    | 96                     | 56 ( <i>S</i> )     |
| 7     | <b>1c</b>              | AcOH (150)                                | -                                       | 0      | 48    | 75                     | 0                   |
| 8     | <b>1b</b>              | AcOH (150)                                | -                                       | -20    | 48    | 95                     | 56 ( <i>S</i> )     |
| 9     | <b>1b</b>              | AcOH (100)                                | -                                       | 0      | 48    | 90                     | 60 ( <i>S</i> )     |
| 10    | <b>1b</b>              | AcOH (300)                                | -                                       | 0      | 48    | 90                     | 60 ( <i>S</i> )     |
| 11    | <b>1b</b>              | AcOH (100)                                | H <sub>2</sub> O (0.125)                | 0      | 96    | 50                     | 42 ( <i>S</i> )     |
| 12    | <b>1b</b>              | AcOH (100)                                | Hexane (0.125)                          | 0      | 48    | 50                     | 64 ( <i>S</i> )     |
| 13    | <b>1b</b>              | AcOH (100)                                | CH <sub>2</sub> Cl <sub>2</sub> (0.125) | 0      | 96    | 80                     | 62 ( <i>S</i> )     |
| 14    | <b>1b</b>              | AcOH (100)                                | THF (0.125)                             | 0      | 96    | 75                     | 32 ( <i>S</i> )     |
| 15    | <b>1b</b>              | AcOH (100)                                | MeOH (0.125)                            | 0      | 96    | 40                     | 20 ( <i>S</i> )     |
| 16    | <b>1b</b>              | AcOH (100)                                | -                                       | 25     | 30    | 84                     | 16 ( <i>S</i> )     |
| 17    | <b>1b</b>              | Me <sub>3</sub> CCO <sub>2</sub> H (100)  | -                                       | 25     | 30    | 95                     | 0                   |
| 18    | <b>1b</b>              | ICH <sub>2</sub> CO <sub>2</sub> H (100)  | -                                       | 25     | 30    | 97                     | 60 ( <i>S</i> )     |
| 19    | <b>1b</b>              | ClCH <sub>2</sub> CO <sub>2</sub> H (100) | -                                       | 25     | 30    | 95                     | 62 ( <i>S</i> )     |
| 20    | <b>1b</b>              | BrCH <sub>2</sub> CO <sub>2</sub> H (100) | -                                       | 25     | 30    | 98                     | 50 ( <i>S</i> )     |
| 21    | <b>1b</b>              | Cl <sub>2</sub> CHCO <sub>2</sub> H (100) | -                                       | 25     | 30    | 40                     | 30 ( <i>S</i> )     |
| 22    | <b>1b</b>              | CF <sub>3</sub> CO <sub>2</sub> H (100)   | -                                       | 25     | 30    | 40                     | 16 ( <i>S</i> )     |
| 23    | <b>1b</b>              | Cl <sub>2</sub> CHCO <sub>2</sub> H (100) | -                                       | 0      | 72    | 82                     | 70 ( <i>S</i> )     |

<sup>a</sup> The reaction was carried out using 5 equiv of acetone (otherwise stated), 20 mol% of catalyst, the indicated amount of acid as co-catalysts at the indicated temperature. <sup>b</sup> Isolated yield after column chromatography. <sup>c</sup> Determined by HPLC

### General procedure for the solvent-free aldol reaction catalysed by **1b**:

To a mixture of the corresponding  $\alpha$ -ketoester **3** (0.25 mmol), catalyst **1b** (0.024 g, 0.05 mmol, 0.2

equiv.) and chloroacetic acid (0.024 g, 0.25 mmol, 1 equiv.) at 0 °C was added the corresponding ketone **2** (1.25 mmol, 5 equiv.). The reaction was stirred until the  $\alpha$ -ketoester was consumed (monitored by TLC). Then, CH<sub>2</sub>Cl<sub>2</sub> (0.5 mL) was added to the mixture and was purified by flash chromatography (hexanes/AcOEt) to yield the pure product **4**.

### Spectra and HPLC data of aldol products:

#### (S)-Methyl 2-hydroxy-4-oxo-2-phenylpentanoate (**6aa**).<sup>2</sup>

White solid; Mp = 56 °C (EtOAc); R<sub>f</sub> = 0.35 (hexanes/EtOAc 7:3);  $\delta_{\text{H}}$  (300 MHz; CDCl<sub>3</sub>, Me<sub>4</sub>Si) 2.21 (s, 3H, CH<sub>3</sub>C=O), 3.01 (d, *J* = 17.6 Hz, 1H, CH<sub>2</sub>), 3.56 (d, *J* = 17.6 Hz, 1H, CH<sub>2</sub>), 3.76 (s, 3H, CO<sub>2</sub>CH<sub>3</sub>), 4.43 (s, 1H, OH), 7.28-7.43 (m, 3H), 7.56 (d, *J* = 8.9 Hz, 2H, ArH);  $\delta_{\text{C}}$  (75 MHz; CDCl<sub>3</sub>, Me<sub>4</sub>Si) 30.6 (CH<sub>3</sub>C=O), 52.9 (CH<sub>2</sub>), 53.1 (CO<sub>2</sub>CH<sub>3</sub>), 76.3 (C-OH), 124.8 (ArCH), 128.0 (ArCH), 128.4 (ArCH), 140.1 (ArC), 174.3 (CO<sub>2</sub>CH<sub>2</sub>CH<sub>3</sub>), 207.8 (C=O); HPLC (Chiralpak AD, n-hexane/*i*-PrOH: 80/20, 0.8 mL/min), *t*<sub>R</sub> 9.508 (minor), *t*<sub>R</sub> 11.189 (major).

#### (S)-Ethyl 2-hydroxy-4-oxo-2-phenylpentanoate (**6ab**).<sup>2</sup>

White solid; Mp = 60 °C (EtOAc); R<sub>f</sub> = 0.33 (hexanes/EtOAc 7:3);  $\delta_{\text{H}}$  (300 MHz; CDCl<sub>3</sub>, Me<sub>4</sub>Si) 1.25 (t, *J* = 7.1 Hz, 3H, OCH<sub>2</sub>CH<sub>3</sub>), 2.20 (s, 3H, COCH<sub>3</sub>), 3.02 (d, *J* = 17.6 Hz, 1H, CH<sub>2</sub>), 3.55 (d, *J* = 17.6 Hz, 1H, CH<sub>2</sub>), 4.22 (q, *J* = 7.1 Hz, 2H, OCH<sub>2</sub>CH<sub>3</sub>), 4.39 (s, 1H, OH), 7.27-7.41 (m, 3H), 7.51-7.65 (m, 2H, ArH);  $\delta_{\text{C}}$  (75 MHz; CDCl<sub>3</sub>, Me<sub>4</sub>Si) 13.9 (OCH<sub>2</sub>CH<sub>3</sub>), 30.6 (CH<sub>3</sub>C=O), 53.0 (CH<sub>2</sub>), 62.2 (OCH<sub>2</sub>CH<sub>3</sub>), 76.5 (C-OH), 124.8 (ArCH), 128.0 (ArCH), 128.4 (ArC), 140.3 (ArC), 173.8 (CO<sub>2</sub>CH<sub>2</sub>CH<sub>3</sub>), 207.6 (C=O); HPLC (Chiralcel ODH, n-hexane/*i*-PrOH: 90/10, 0.8 mL/min), *t*<sub>R</sub> 21.090 (minor), *t*<sub>R</sub> 26.470 (major).

#### (S)-Ethyl 2-hydroxy-2-methyl-4-oxopentanoate (**6ac**).<sup>3</sup>

Colorless oil; R<sub>f</sub> = 0.29 (hexanes/EtOAc 7:3);  $\delta_{\text{H}}$  (300 MHz; CDCl<sub>3</sub>, Me<sub>4</sub>Si) 1.28 (t, *J* = 7.1 Hz, 3H, OCH<sub>2</sub>CH<sub>3</sub>), 1.39 (s, 3H, CH<sub>3</sub>C=O), 2.17 (s, 3H, CH<sub>3</sub>COH), 2.81 (d, *J* = 17.6 Hz, 1H, CH<sub>2</sub>), 3.13 (d, *J* = 17.6 Hz, 1H, CH<sub>2</sub>), 3.82 (s, 1H, OH), 4.23 (q, *J* = 7.1 Hz, 2H, OCH<sub>2</sub>CH<sub>3</sub>);  $\delta_{\text{C}}$  (75 MHz; CDCl<sub>3</sub>, Me<sub>4</sub>Si) 14.0 (OCH<sub>2</sub>CH<sub>3</sub>), 26.1 (CH<sub>3</sub>COH), 30.5 (CH<sub>3</sub>C=O), 52.2 (CH<sub>2</sub>), 61.7 (OCH<sub>2</sub>CH<sub>3</sub>), 72.4 (COH), 175.7 (CO<sub>2</sub>CH<sub>2</sub>CH<sub>3</sub>), 207.7 (C=O); GC (Lipodex E, 50 m, 0.25 mm, T = 100 °C, P = 14.3 psi), *t*<sub>R</sub> 70.6 (minor), *t*<sub>R</sub> 84.3 (major).

#### (S)-Ethyl 2-hydroxy-2-(4-nitrophenyl)-4-oxopentanoate (**6ad**).<sup>2</sup>

White solid; Mp = 67 °C (EtOAc); R<sub>f</sub> = 0.35 (hexanes/EtOAc 7:3);  $\delta_{\text{H}}$  (300 MHz; CDCl<sub>3</sub>, Me<sub>4</sub>Si) 1.27 (t, *J* = 7.1 Hz, 3H, OCH<sub>2</sub>CH<sub>3</sub>), 2.24 (s, 3H, CH<sub>3</sub>C=O), 3.01 (d, *J* = 17.6 Hz, 1H, CH<sub>2</sub>), 3.57 (d, *J* = 17.6 Hz, 1H, CH<sub>2</sub>), 4.25 (q, *J* = 7.1 Hz, 2H, OCH<sub>2</sub>CH<sub>3</sub>), 4.53 (s, 1H, OH), 7.80 (d, *J* = 8.9 Hz, 2H, ArH), 8.22 (d, *J* = 8.9 Hz, 2H, ArH);  $\delta_{\text{C}}$  (75 MHz; CDCl<sub>3</sub>, Me<sub>4</sub>Si) 13.8 (OCH<sub>2</sub>CH<sub>3</sub>), 30.5 (CH<sub>3</sub>C=O), 52.8 (CH<sub>2</sub>), 62.8 (OCH<sub>2</sub>CH<sub>3</sub>), 76.1 (COH), 123.5 (ArCH), 126.0 (ArCH), 147.2 (Ar), 147.6 (ArC), 172.7 (CO<sub>2</sub>), 206.8 (C=O); HPLC (Chiralpak AD, n-hexane/*i*-PrOH: 90/10, 0.6 mL/min), *t*<sub>R</sub> 21.427 (minor), *t*<sub>R</sub> 23.833 (major).

#### (R)-Ethyl 2-hydroxy-4-oxo-2-(thiophen-2-yl)pentanoate (**6ae**).<sup>4</sup>

Colorless oil; R<sub>f</sub> = 0.33 (hexanes/EtOAc 7:3);  $\delta_{\text{H}}$  (300 MHz; CDCl<sub>3</sub>, Me<sub>4</sub>Si) 1.28 (t, *J* = 7.1 Hz, 3H,

OCH<sub>2</sub>CH<sub>3</sub>), 2.20 (s, 3H, CH<sub>3</sub>CO), 3.20 (d, *J* = 17.6 Hz, 1H, CH<sub>2</sub>), 3.51 (d, *J* = 17.6 Hz, 1H, CH<sub>2</sub>), 4.26 (q, *J* = 7.1 Hz, 2H, OCH<sub>2</sub>CH<sub>3</sub>), 4.45 (s, 1H, OH), 6.97 (dd, *J* = 3.6, 5.1 Hz, 1H, ArH), 7.06 (dd, *J* = 1.3, 3.6 Hz, 1H, ArH), 7.36–7.22 (m, 1H, ArH).;  $\delta_c$  (75 MHz; CDCl<sub>3</sub>, Me<sub>4</sub>Si) 13.9 (OCH<sub>2</sub>CH<sub>3</sub>), 30.5 (CH<sub>3</sub>C=O), 53.6 (CH<sub>2</sub>), 62.6 (OCH<sub>2</sub>CH<sub>3</sub>), 74.8 (COH), 123.7 (ArCH), 125.3 (ArCH), 127.0 (ArCH), 145.1 (ArC), 172.8 (CO<sub>2</sub>), 206.2 (C=O); HPLC (Chiralpak AD, n-hexane/*i*-PrOH: 90/10, 0.6 mL/min), *t<sub>R</sub>* 21.218 (major), *t<sub>R</sub>* 26.330 (minor).

#### (S)-Ethyl 2-hydroxy-2-(4-nitrophenyl)-4-oxohexanoate (6bd).

Yellow solid; Mp = 55 °C (EtOAc);  $[\alpha]_D^{25} = 47$  (*c* 1.3, CHCl<sub>3</sub>); *R<sub>f</sub>* = 0.29 (hexanes/EtOAc 7:3); IR  $\nu_{\max}/\text{cm}^{-1}$  (KBr) 3485, 3112, 2981, 1730, 1605, 1593, 1516, 1403, 1341, 1268, 1109, 855 cm<sup>-1</sup>;  $\delta_H$  (300 MHz; CDCl<sub>3</sub>, Me<sub>4</sub>Si) 1.09 (t, *J* = 7.3 Hz, 3H, OCCH<sub>2</sub>CH<sub>3</sub>), 1.27 (t, *J* = 7.1 Hz, 3H, OCH<sub>2</sub>CH<sub>3</sub>), 2.40–2.66 (m, 2H, OCCH<sub>2</sub>CH<sub>3</sub>), 2.99 (d, *J* = 17.4 Hz, 1H, CH<sub>2</sub>), 3.54 (d, *J* = 17.4 Hz, 1H, CH<sub>2</sub>), 4.26 (q, *J* = 7.1 Hz, 2H, OCH<sub>2</sub>CH<sub>3</sub>), 4.60 (s, 1H, OH), 7.81 (d, *J* = 8.8 Hz, 2H, ArCH), 8.21 (d, *J* = 8.8 Hz, 2H, ArCH);  $\delta_c$  (75 MHz; CDCl<sub>3</sub>, Me<sub>4</sub>Si) 7.2 (O=CCH<sub>2</sub>CH<sub>3</sub>), 13.8 (OCH<sub>2</sub>CH<sub>3</sub>), 36.5 (CH<sub>2</sub>), 51.6 (CH<sub>2</sub>), 63.3 (OCH<sub>2</sub>CH<sub>3</sub>), 76.2 (C-OH), 123.7 (ArH), 126.3 (ArH), 147.0 (Ar), 147.8 (Ar), 172.4 (CO<sub>2</sub>CH<sub>2</sub>CH<sub>3</sub>), 200.3 (C=O) HRMS-DIP (*m/z*): [M<sup>+</sup>-CO<sub>2</sub>Et] calcd for C<sub>13</sub>H<sub>12</sub>NO<sub>4</sub> 222.0766; found: 222.0765. HPLC (Chiralcel ODH, n-hexane/*i*-PrOH: 90/10, 0.5 mL/min), *t<sub>R</sub>* 22.902 (minor), *t<sub>R</sub>* 31.025 (major).

#### (R)-ethyl 2-hydroxy-3-methoxy-2-(4-nitrophenyl)-4-oxopentanoate (7cd).

Brown oil;  $[\alpha]_D^{25} = -124$  (*c* 1.17, CHCl<sub>3</sub>); *R<sub>f</sub>* = 0.30 (hexanes/EtOAc 7:3); IR  $\nu_{\max}/\text{cm}^{-1}$  (film) 3335, 3192, 2964, 2869, 1676, 1592;  $\delta_H$  (300 MHz; CDCl<sub>3</sub>, Me<sub>4</sub>Si) 1.34 (t, *J* = 7.1 Hz, 3H, OCH<sub>2</sub>CH<sub>3</sub>), 2.15 (s, 3H, O=CCH<sub>3</sub>), 3.46 (s, 3H, OCH<sub>3</sub>), 4.20 (s, 1H, OH), 4.26 (s, 1H, CHOCH<sub>3</sub>), 4.35 (m, 2H, OCH<sub>2</sub>CH<sub>3</sub>), 7.88 (d, *J* = 9.0 Hz, 2H, ArCH), 8.21 (d, *J* = 9.0 Hz, 2H, ArCH);  $\delta_c$  (75 MHz; CDCl<sub>3</sub>, Me<sub>4</sub>Si) 14.1 (OCH<sub>2</sub>CH<sub>3</sub>), 27.7 (O=CCH<sub>3</sub>), 59.5 (OCH<sub>3</sub>), 63.6 (OCH<sub>2</sub>CH<sub>3</sub>), 80.0 (C-OH), 90.3 (HCOCH<sub>3</sub>), 123.2 (ArCH), 127.7 (ArCH), 143.1 (ArC), 147.8 (ArC), 171.1 (CO<sub>2</sub>CH<sub>2</sub>CH<sub>3</sub>), 207.7 (C=O); HRMS-DIP (*m/z*): [M<sup>+</sup>-COMe] calcd for C<sub>12</sub>H<sub>14</sub>NO<sub>6</sub> 268.0821; found: 268.0828. HPLC (Chiralpak AD, n-hexane/*i*-PrOH: 90/10, 0.5 mL/min), *t<sub>R</sub>* 59.164 (minor), *t<sub>R</sub>* 31.471 (major).

#### (S)-ethyl 5-chloro-2-hydroxy-2-(4-nitrophenyl)-4-oxopentanoate (6dd).

Colorless solid; Mp = 95 °C (EtOAc);  $[\alpha]_D^{25} = -185$  (*c* 1, CHCl<sub>3</sub>); *R<sub>f</sub>* = 0.29 (hexanes/EtOAc 7:3) IR  $\nu_{\max}/\text{cm}^{-1}$  (film) 3475, 3108, 3077, 3000, 2939, 1734, 1722, 1686, 1593, 1516, 1403, 1341, 1268, 1101, 859;  $\delta_H$  (300 MHz; CDCl<sub>3</sub>, Me<sub>4</sub>Si) 1.29 (t, *J* = 7.1 Hz, 3H, OCH<sub>2</sub>CH<sub>3</sub>), 3.22 (d, *J* = 17.4 Hz, 1H, CH<sub>2</sub>), 3.63 (d, *J* = 17.4 Hz, 1H, CH<sub>2</sub>), 4.14 (s, 2H, ClCH<sub>2</sub>CO), 4.29 (q, *J* = 7.2 Hz, 2H, OCH<sub>2</sub>CH<sub>3</sub>), 4.33 (s, 1H, OH), 7.81 (d, *J* = 9.0 Hz, 2H, ArH), 8.24 (d, *J* = 9.0 Hz, 2H, ArH);  $\delta_c$  (75 MHz; CDCl<sub>3</sub>, Me<sub>4</sub>Si) 13.9 (CH<sub>3</sub>), 48.3 (CH<sub>2</sub>), 49.3 (ClCH<sub>2</sub>), 63.3 (OCH<sub>2</sub>CH<sub>3</sub>), 76.0 (C-OH), 123.4 (ArCH), 126.1 (ArCH), 147.0 (ArC), 147.8 (ArC), 172.7 (CO<sub>2</sub>CH<sub>2</sub>CH<sub>3</sub>), 200.3 (CO); HRMS-DIP (*m/z*): [M<sup>+</sup>-CO<sub>2</sub>Et] calcd for C<sub>10</sub>H<sub>9</sub>ClNO<sub>4</sub> 243.0220; found 243.10218; HPLC (Chiralpak AD, n-hexane/*i*-PrOH: 90/10, 1.0 mL/min), *t<sub>R</sub>* 21.344 (minor), *t<sub>R</sub>* 31.130 (major).

#### (S)-ethyl 5-(benzyloxy)-2-hydroxy-2-(4-nitrophenyl)-4-oxopentanoate (6ed).

Brown oil; *R<sub>f</sub>* = 0.29 (hexanes/EtOAc 7:3); IR  $\nu_{\max}/\text{cm}^{-1}$  (film) 3493, 2977, 2921, 2864, 1732, 1603, 1521, 1348, 1258, 1211, 1106;  $\delta_H$  (300 MHz; CDCl<sub>3</sub>, Me<sub>4</sub>Si) 1.27 (t, *J* = 7.1 Hz, 3H, OCH<sub>2</sub>CH<sub>3</sub>), 3.12 (d, *J* = 17.7 Hz, 1H, CH<sub>2</sub>), 3.54 (d, *J* = 17.7 Hz, 1H, CH<sub>2</sub>), 4.09 (s, 2H, O=CCH<sub>2</sub>O<sub>Bn</sub>), 4.26 (q, *J* =

7.1 Hz, 2H, OCH<sub>2</sub>CH<sub>3</sub>), 4.40 (s, 1H, OH), 4.59 (s, 2H, OCH<sub>2</sub>Ph), 7.29 – 7.41 (m, 5H, ArH), 7.82 (d, *J* = 9.0 Hz, 2H, ArH), 8.22 (d, *J* = 9.0 Hz, 2H, ArH);  $\delta_c$  (75 MHz; CDCl<sub>3</sub>, Me<sub>4</sub>Si) 13.9 (CH<sub>3</sub>), 48.8 (O=CCH<sub>2</sub>COH), 63.0(OCH<sub>2</sub>), 73.6(CH<sub>2</sub>Ar), 75.2(O=CCH<sub>2</sub>OBn), 76.0(HOCAr), 123.6(ArC), 126.3(ArC), 128.0(ArC), 128.2(ArC), 128.6(ArC), 136.7(ArC), 147.4(ArC), 147.7(ArC), 172.7(CO<sub>2</sub>CH<sub>2</sub>CH<sub>3</sub>), 206.9(CO); HRMS-DIP (*m/z*): [M<sup>+</sup>-CO<sub>2</sub>Et] calcd for C<sub>17</sub>H<sub>17</sub>NO<sub>5</sub> 314.1000; found 314.1034; HPLC (Chiralpak AD, n-hexane/*i*-PrOH: 90/10, 1.0 mL/min), *t<sub>R</sub>* 32.022 (minor), *t<sub>R</sub>* 46.248 (major).

**(S)-ethyl 2-hydroxy-5-(methylthio)-2-(4-nitrophenyl)-4-oxopentanoate (6fd).**

Brown oil;  $[\alpha]_D^{25} = -65$  (*c* 1, CHCl<sub>3</sub>); *R<sub>f</sub>* = 0.35 (hexanes/EtOAc 7:3); IR  $\nu_{\max}/\text{cm}^{-1}$  (film) 3485, 3192, 2981, 2920, 1735, 1605, 1522, 1348, 1105, 856;  $\delta_H$  (300 MHz; CDCl<sub>3</sub>, Me<sub>4</sub>Si) 1.28 (t, *J* = 7.1 Hz, 3H, OCH<sub>2</sub>CH<sub>3</sub>), 2.07 (s, 3H, SCH<sub>3</sub>), 3.22 (s, 2H, SCH<sub>3</sub>CH<sub>2</sub>CO), 3.30 (d, *J* = 17.5 Hz, 1H, CH<sub>2</sub>), 3.72 (d, *J* = 17.5 Hz, 1H, CH<sub>2</sub>), 4.27 (q, *J* = 7.1 Hz, 2H, OCH<sub>2</sub>CH<sub>3</sub>), 4.49 (s, 1H, OH), 7.82 (d, *J* = 9.0 Hz, 2H, ArH), 8.22 (d, *J* = 9.0 Hz, 2H, ArH);  $\delta_c$  (75 MHz; CDCl<sub>3</sub>, Me<sub>4</sub>Si) 13.9 (CH<sub>3</sub>), 15.4 (SCH<sub>3</sub>), 43.2 (CH<sub>2</sub>), 49.3 (CH<sub>2</sub>), 62.9 (OCH<sub>2</sub>CH<sub>3</sub>), 76.1 (C-OH), 123.5 (ArH), 126.3 (ArH), 147.3 (Ar), 147.6 (Ar), 172.7 (CO<sub>2</sub>CH<sub>2</sub>CH<sub>3</sub>), 203.2 (C=O); HRMS-DIP (*m/z*): [M<sup>+</sup>] calcd for C<sub>13</sub>H<sub>17</sub>NO<sub>7</sub> 327.0777; found 327.0791; HPLC (Chiralpak AD, n-hexane/*i*-PrOH: 90/10, 0.9 mL/min), *t<sub>R</sub>* 38.943 (minor), *t<sub>R</sub>* 59.684 (major).

## NMR spectra for aldol products

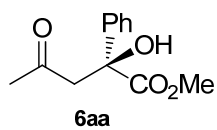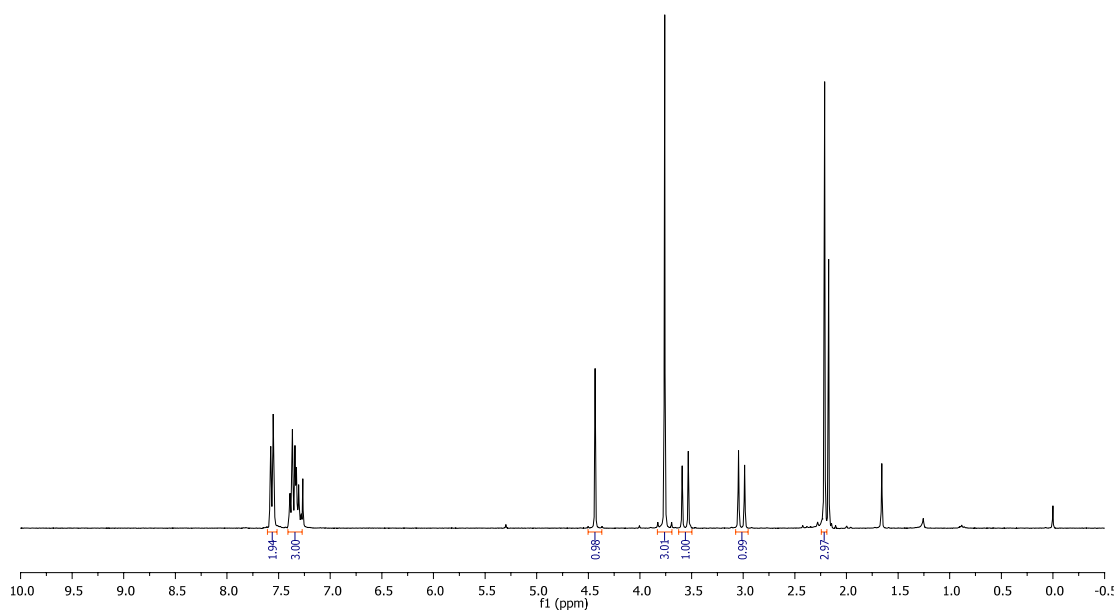

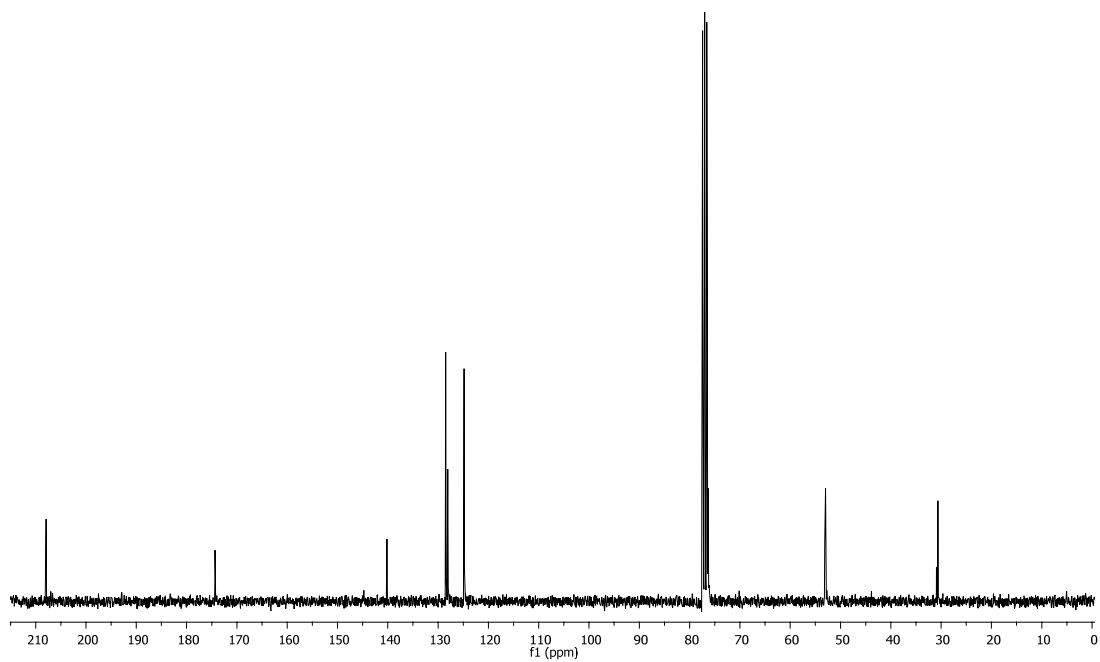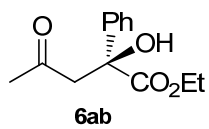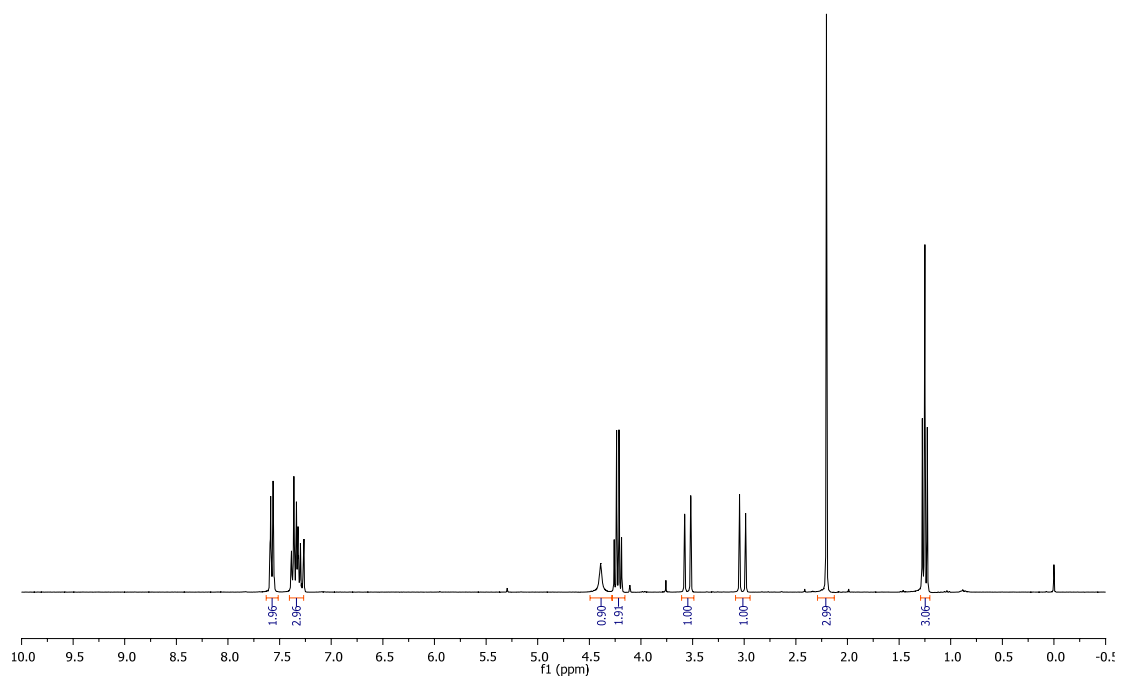



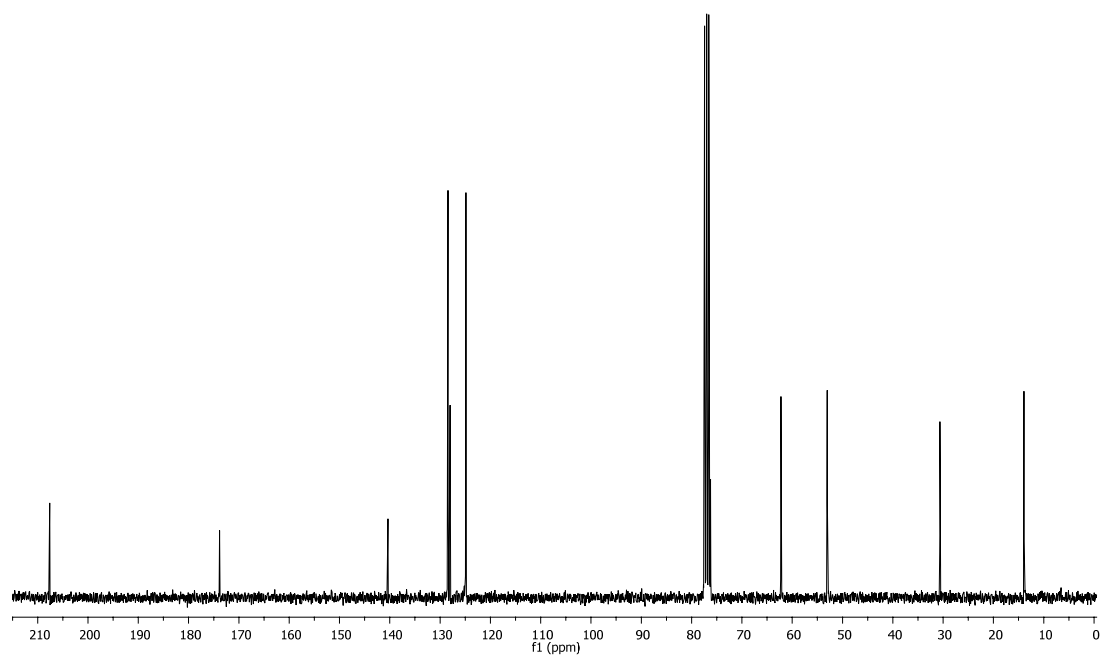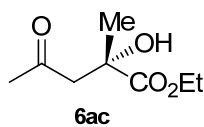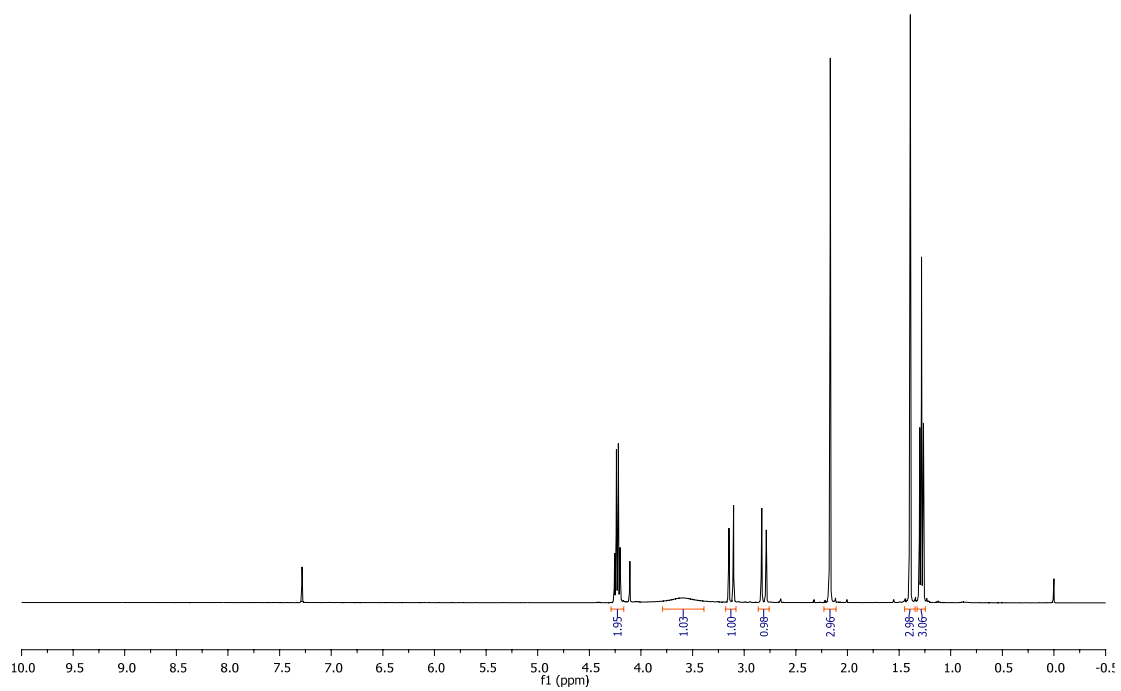

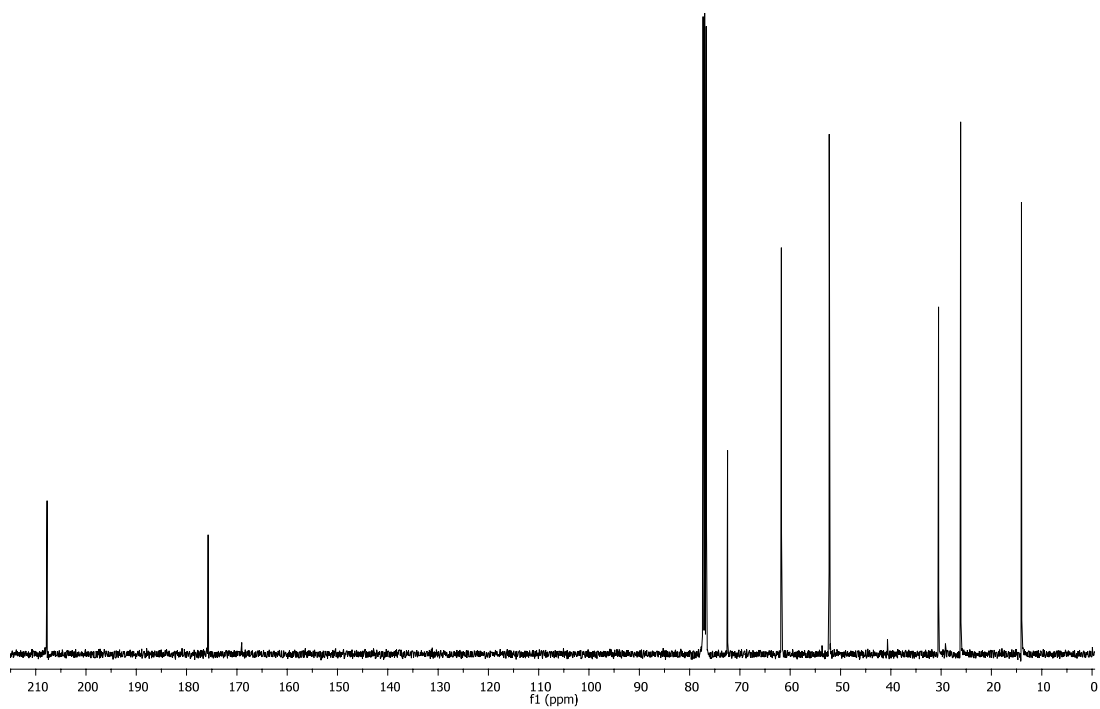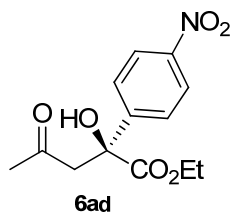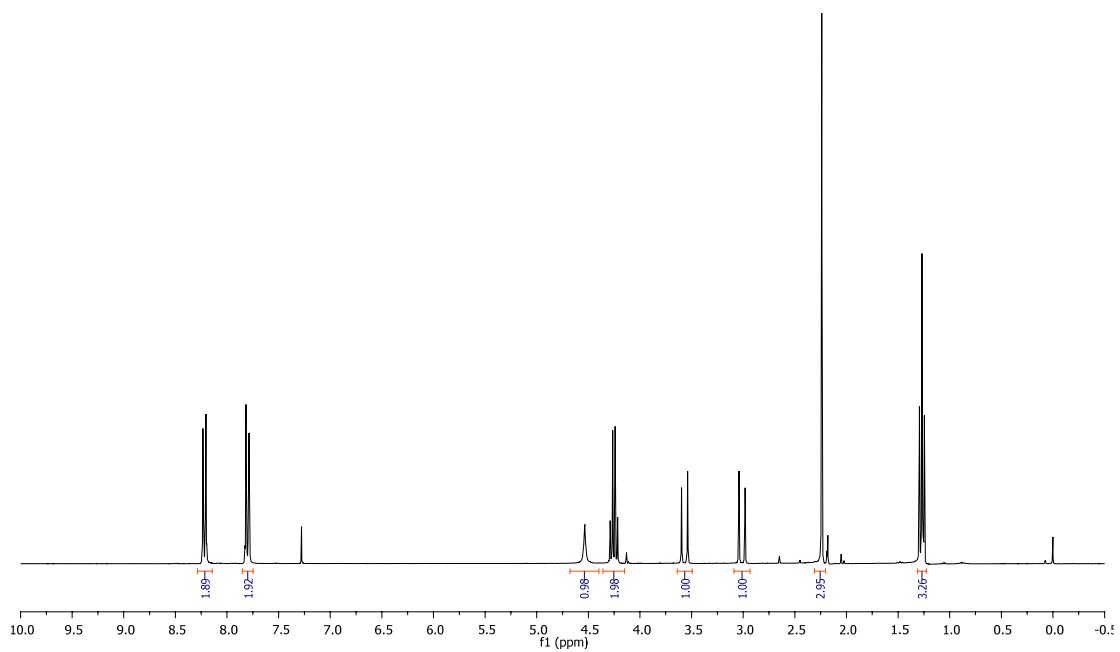

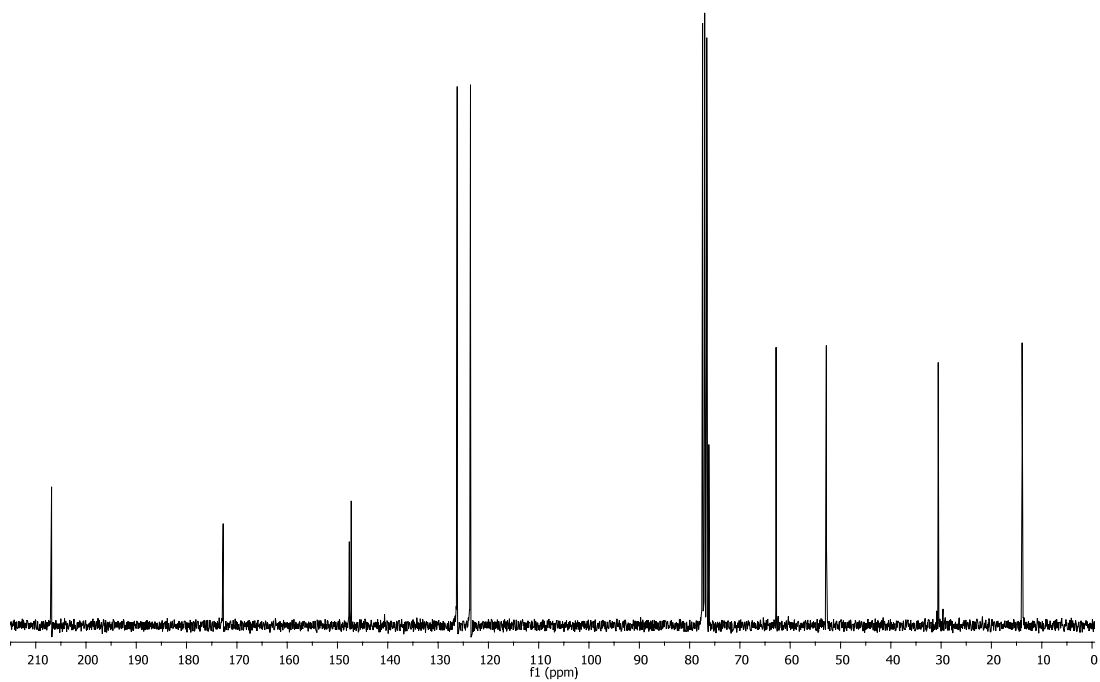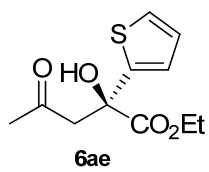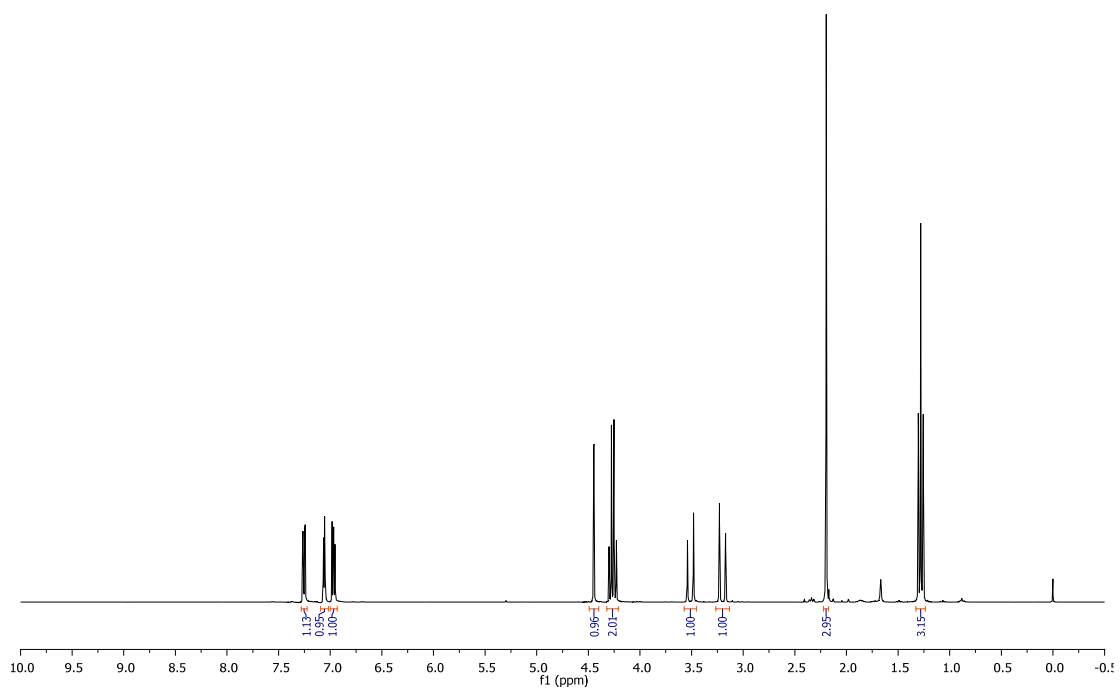

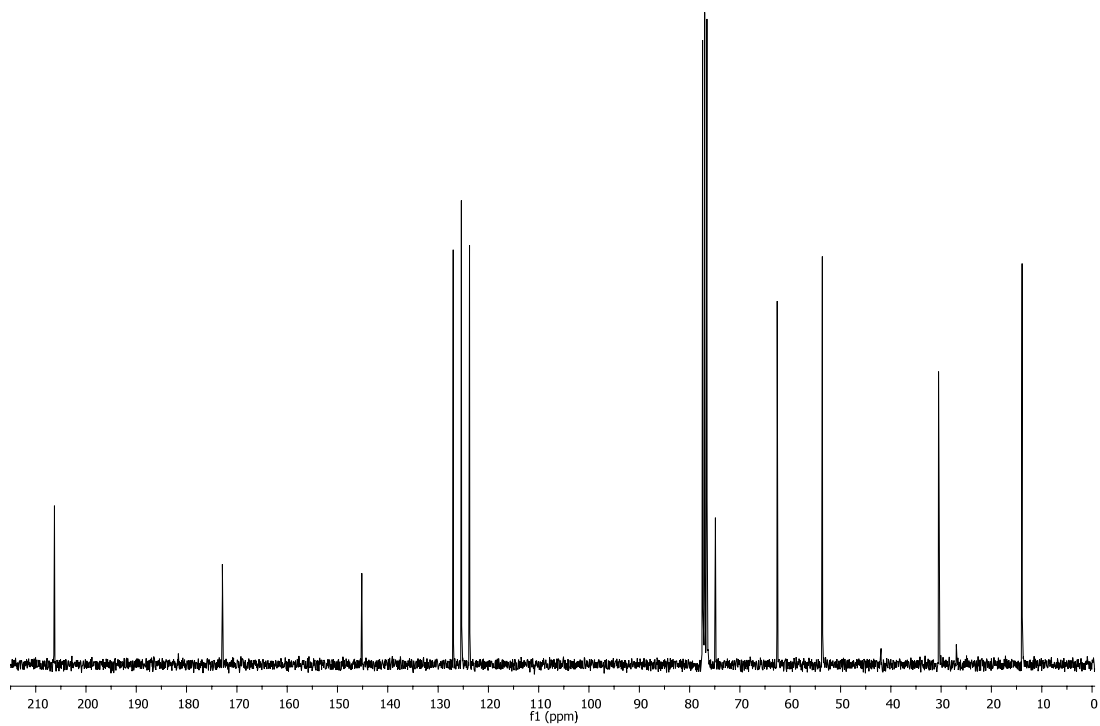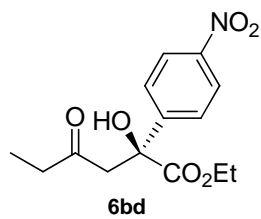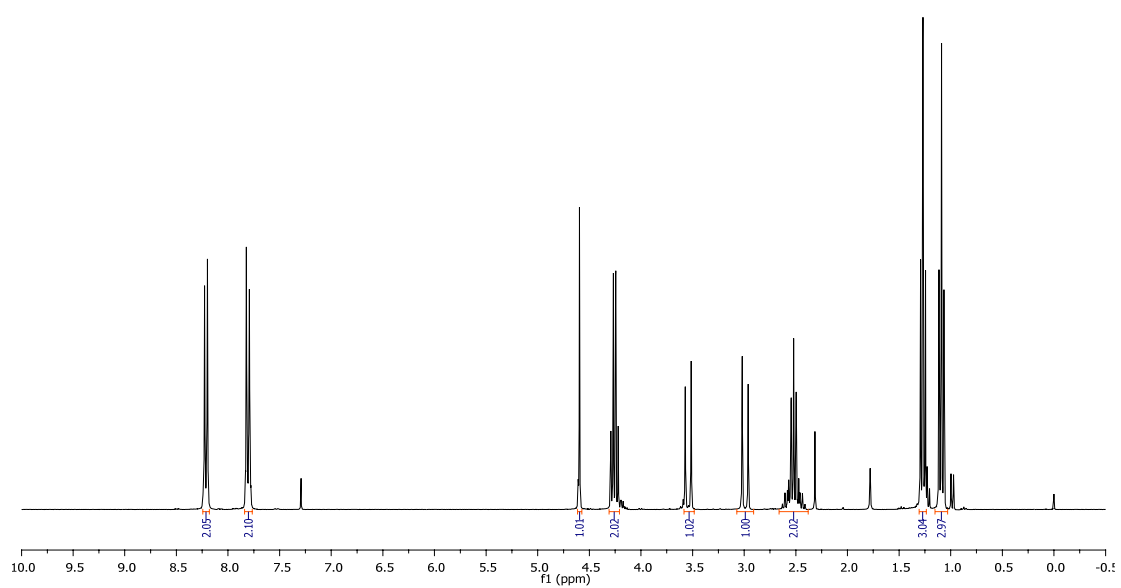

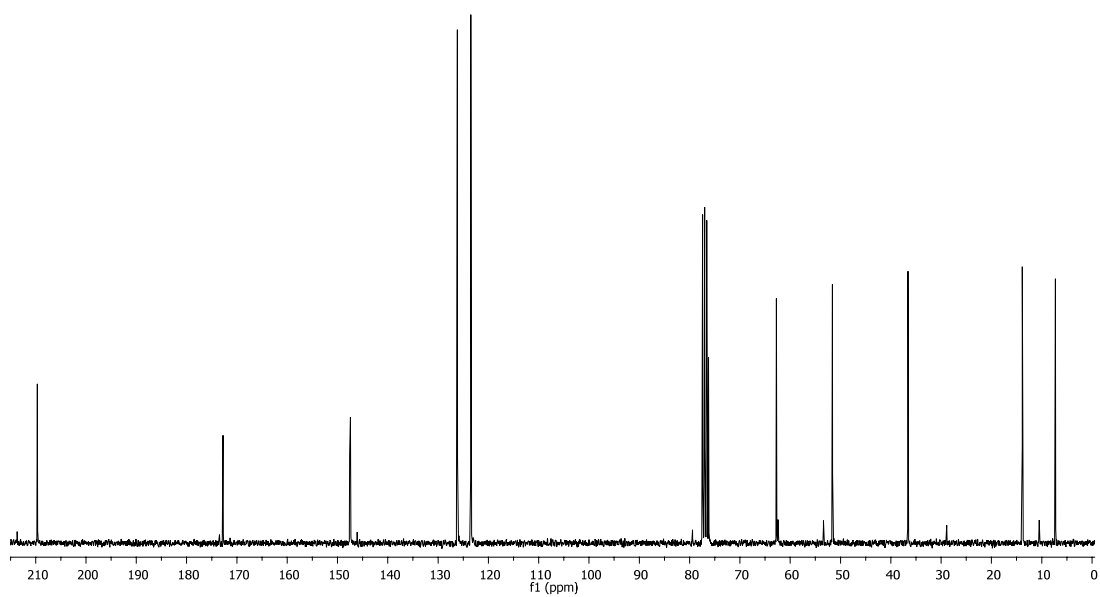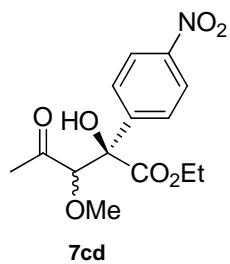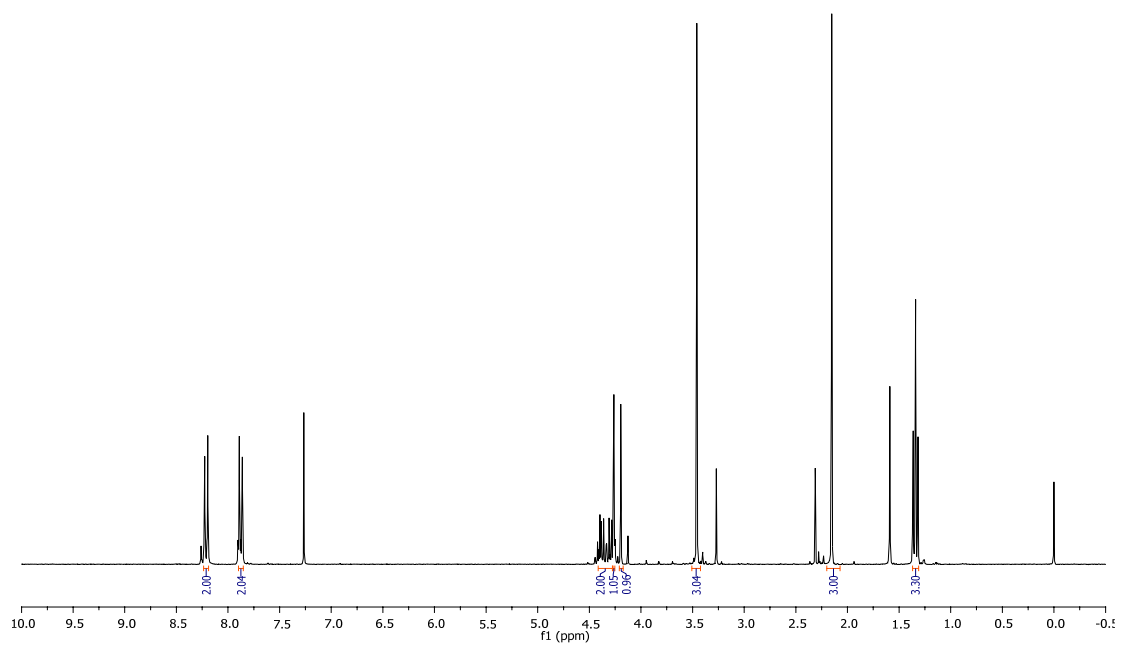

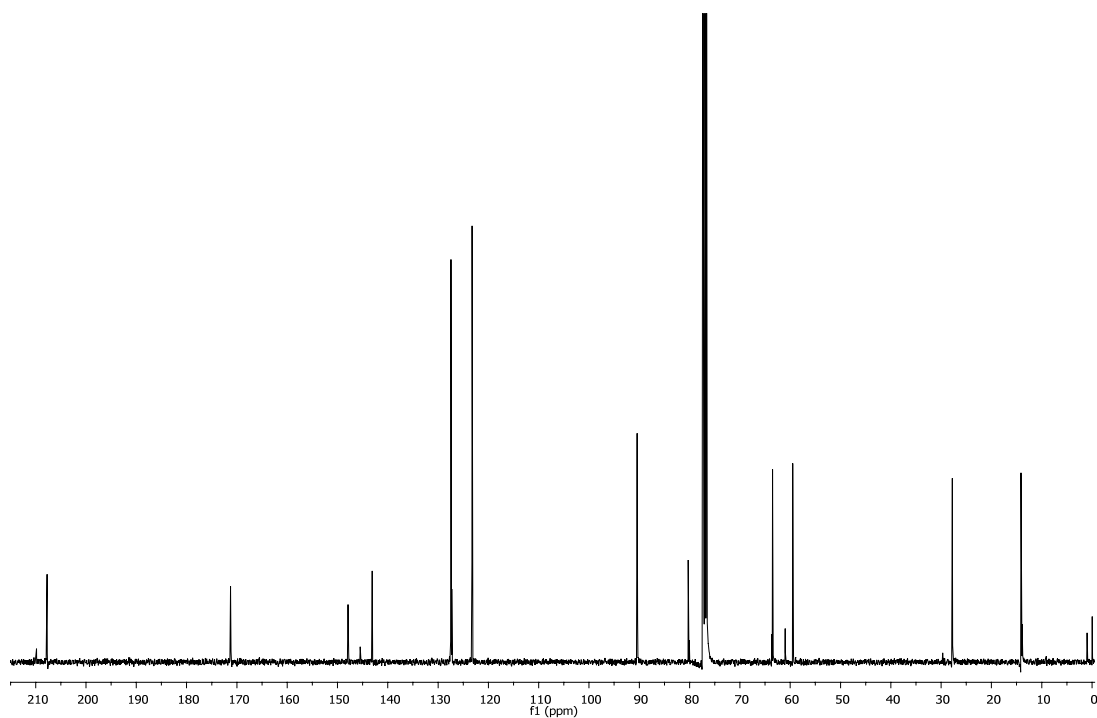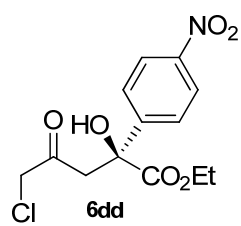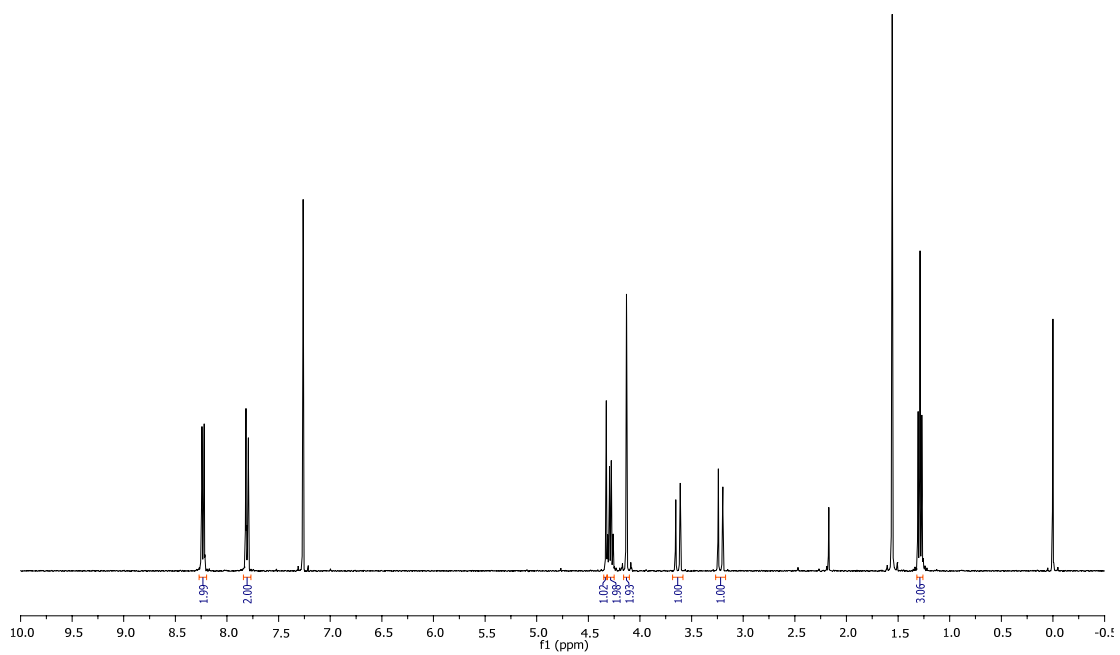

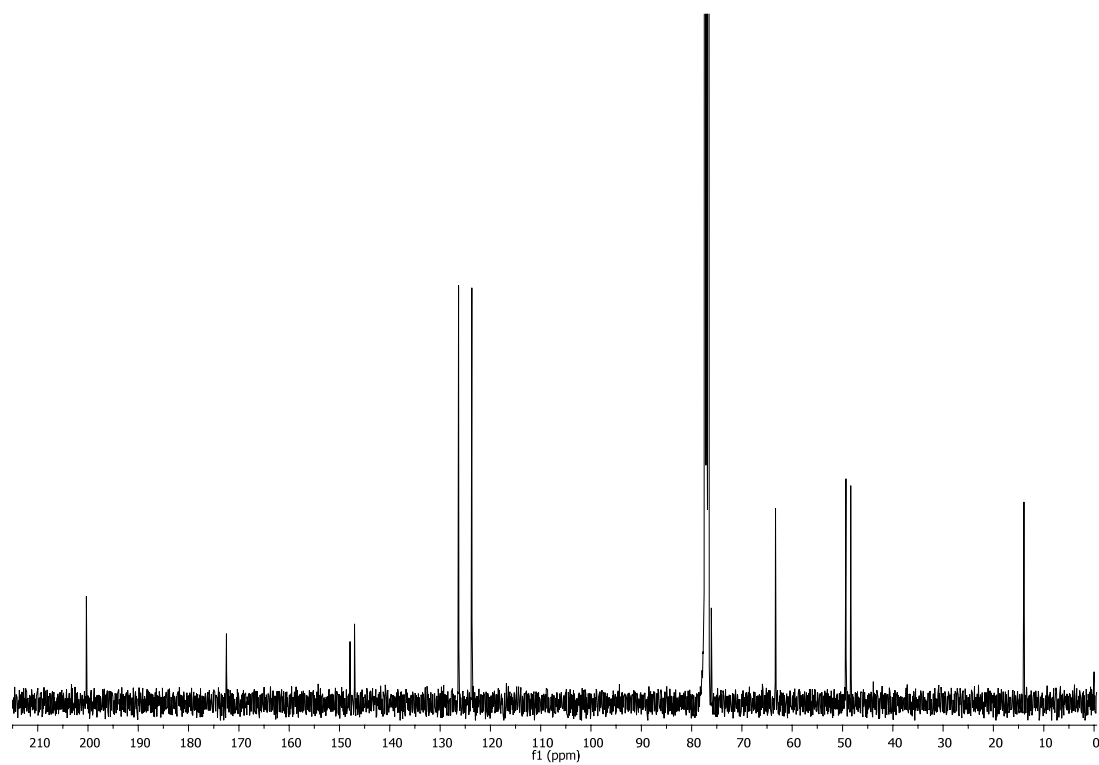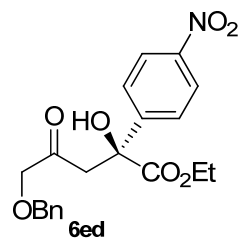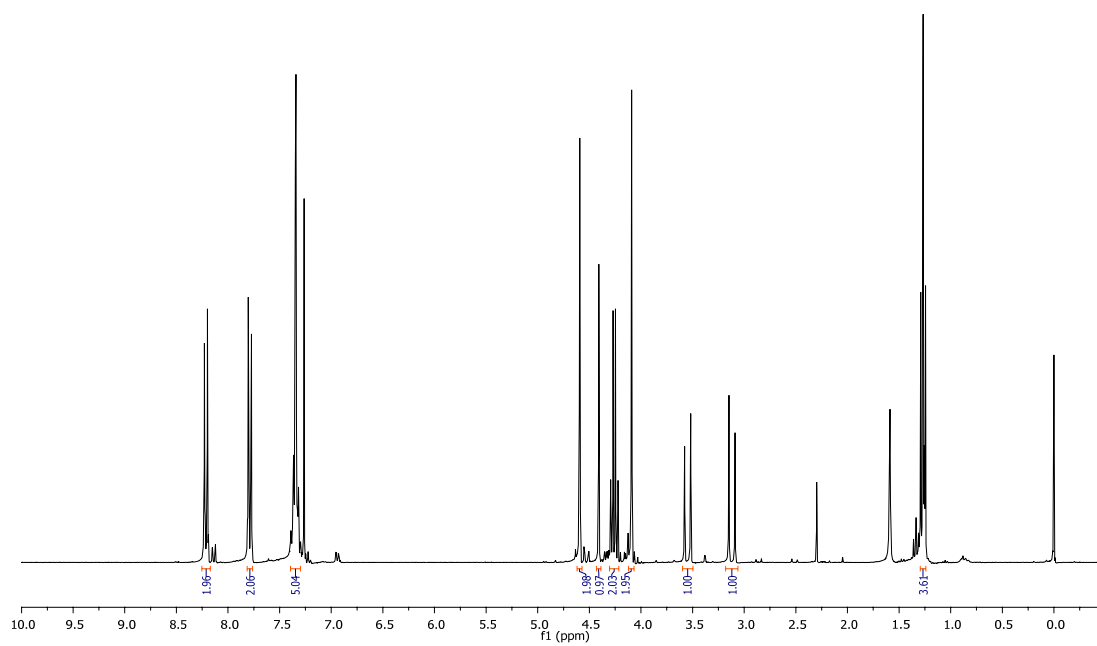

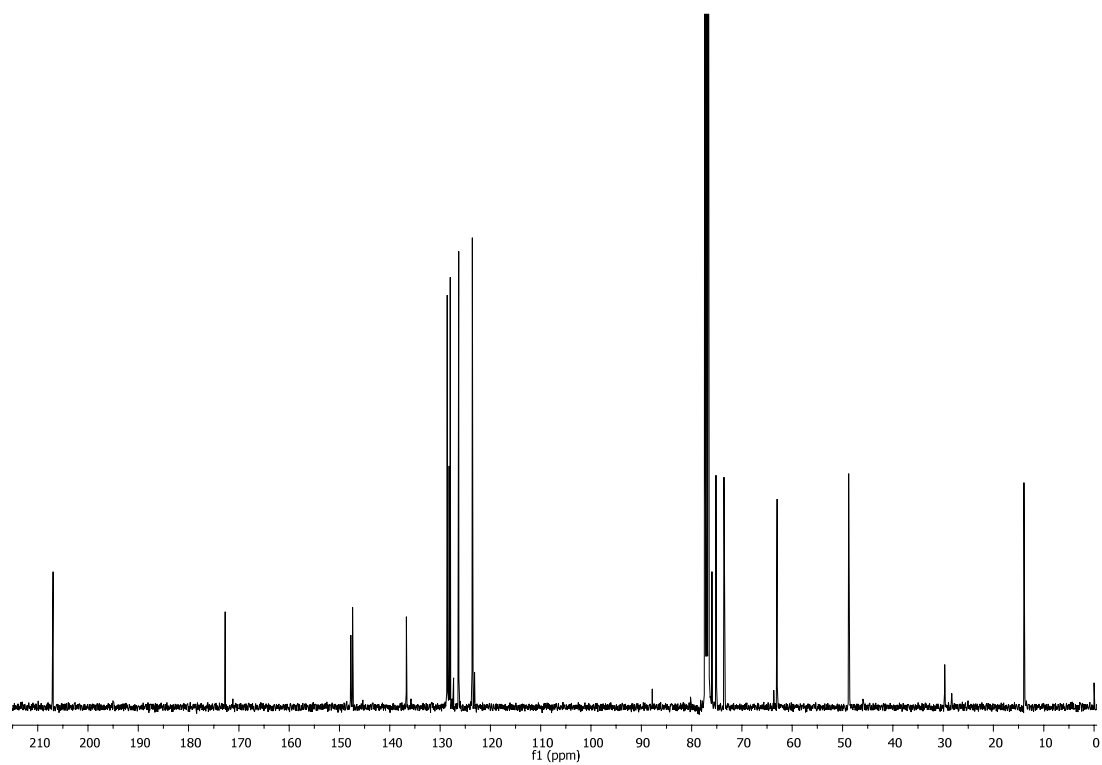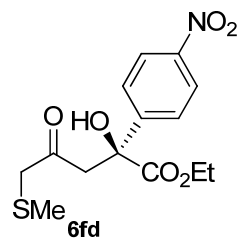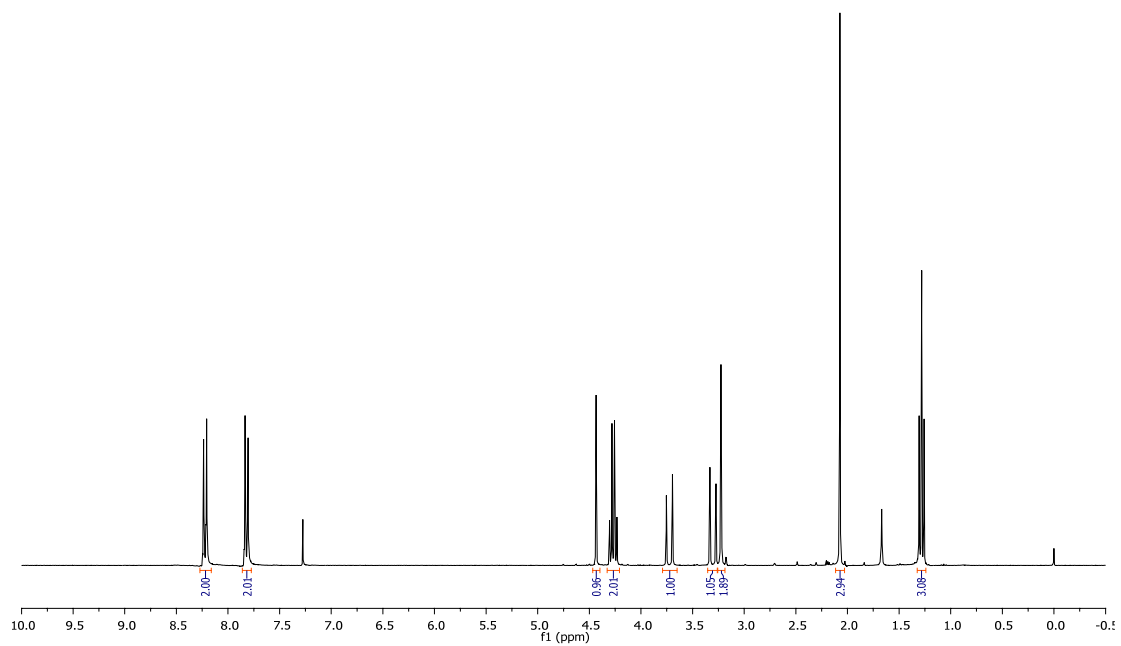



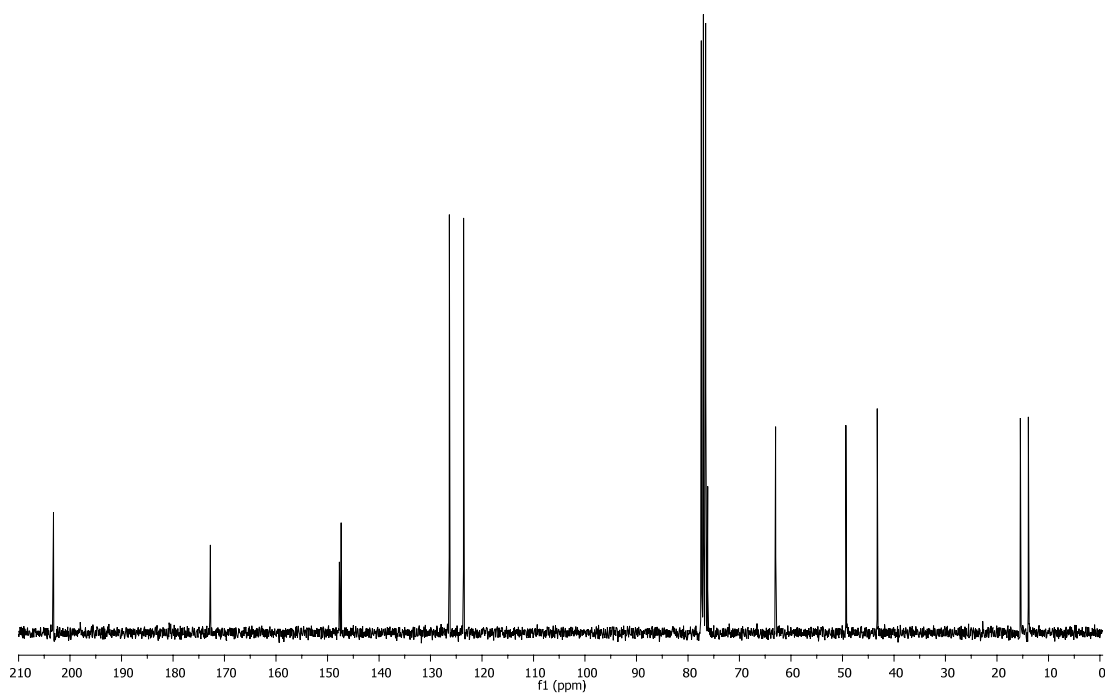

### HPLC chromatograms for aldol products

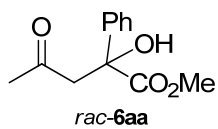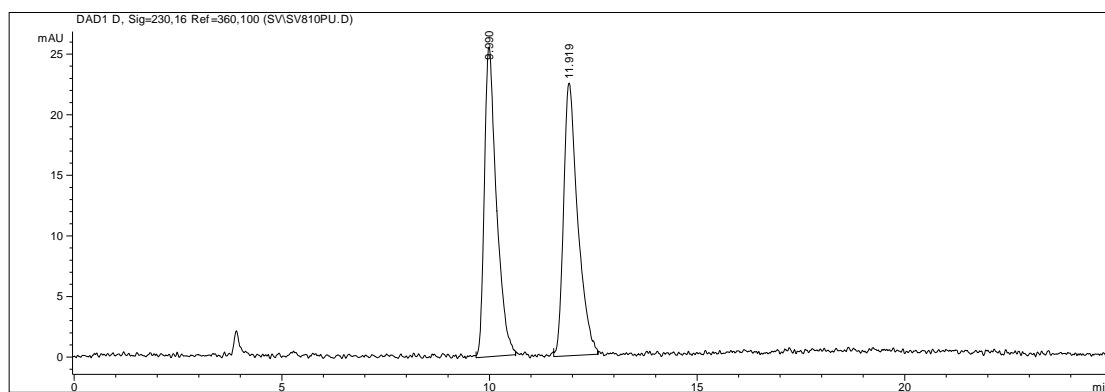

| Peak # | RetTime [min] | Type | Width [min] | Area [mAU*s] | Height [mAU] | Area %  |
|--------|---------------|------|-------------|--------------|--------------|---------|
| 1      | 9.990         | BB   | 0.2914      | 515.65900    | 25.55392     | 49.1322 |
| 2      | 11.919        | BB   | 0.3308      | 533.87573    | 22.50472     | 50.8678 |

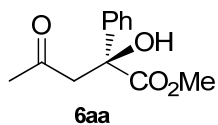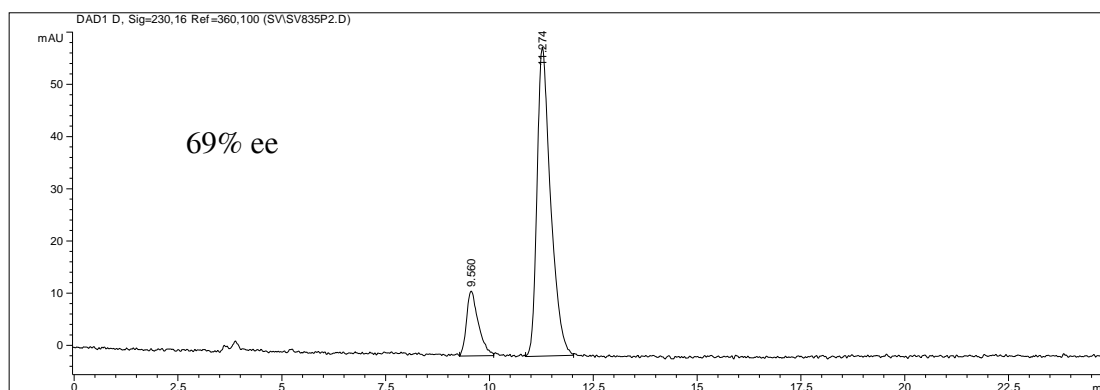

| Peak # | RetTime [min] | Type | Width [min] | Area [mAU*s] | Height [mAU] | Area %  |
|--------|---------------|------|-------------|--------------|--------------|---------|
| 1      | 9.560         | VV   | 0.2789      | 245.16331    | 12.38515     | 15.4430 |
| 2      | 11.274        | VB   | 0.3287      | 1342.36902   | 59.16234     | 84.5570 |

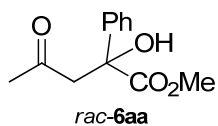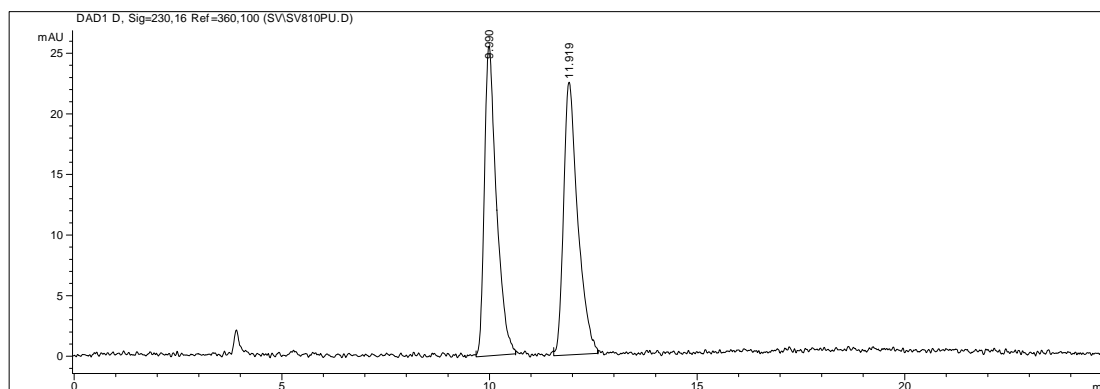

| Peak # | RetTime [min] | Type | Width [min] | Area [mAU*s] | Height [mAU] | Area %  |
|--------|---------------|------|-------------|--------------|--------------|---------|
| 1      | 9.990         | BB   | 0.2914      | 515.65900    | 25.55392     | 49.1322 |
| 2      | 11.919        | BB   | 0.3308      | 533.87573    | 22.50472     | 50.8678 |

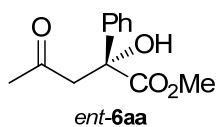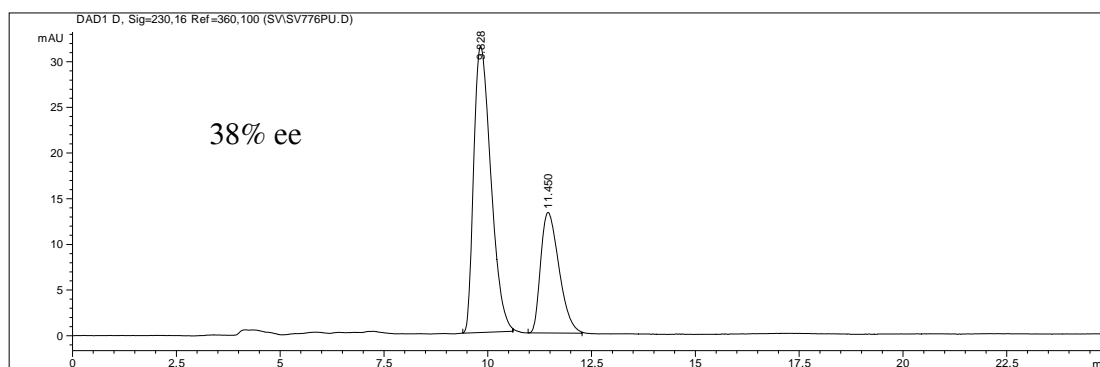

| Peak # | RetTime [min] | Type | Width [min] | Area [mAU*s] | Height [mAU] | Area %  |
|--------|---------------|------|-------------|--------------|--------------|---------|
| 1      | 9.828         | BB   | 0.4476      | 901.59406    | 31.34191     | 68.9937 |
| 2      | 11.450        | PB   | 0.4782      | 405.18329    | 13.19829     | 31.0063 |

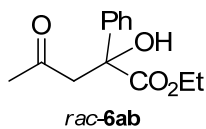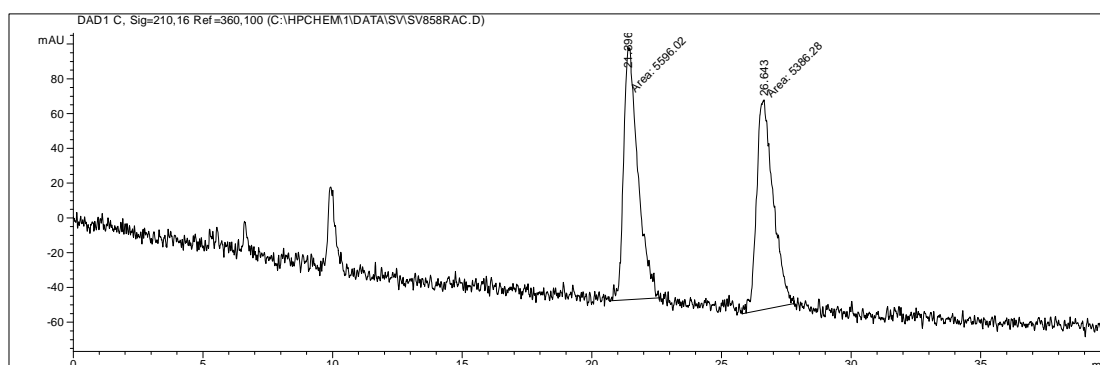

| Peak # | RetTime [min] | Type | Width [min] | Area [mAU*s] | Height [mAU] | Area %  |
|--------|---------------|------|-------------|--------------|--------------|---------|
| 1      | 21.396        | MM T | 0.6433      | 5596.01514   | 144.97832    | 50.9549 |
| 2      | 26.643        | MM T | 0.7816      | 5386.27539   | 120.47549    | 49.0451 |

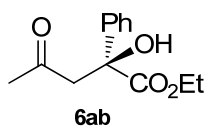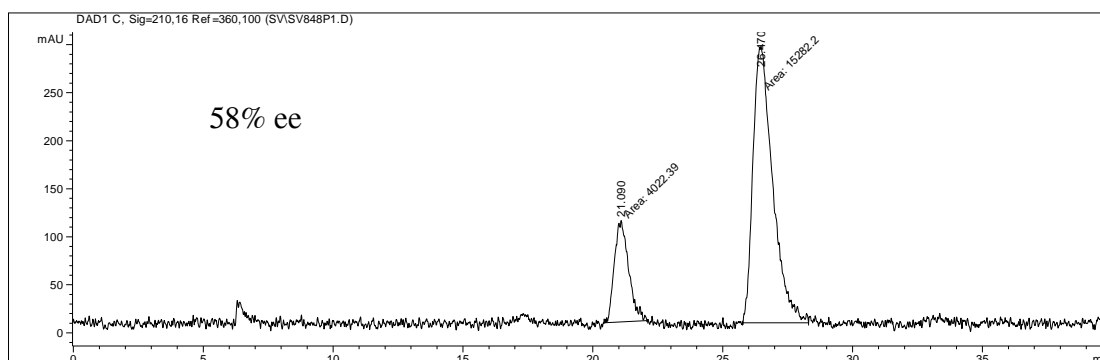

| Peak # | RetTime [min] | Type | Width [min] | Area [mAU*s] | Height [mAU] | Area %  |
|--------|---------------|------|-------------|--------------|--------------|---------|
| 1      | 21.090        | MM T | 0.6357      | 4022.39331   | 105.46560    | 20.8365 |
| 2      | 26.470        | MM T | 0.8850      | 1.52822e4    | 287.78452    | 79.1635 |

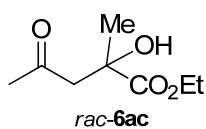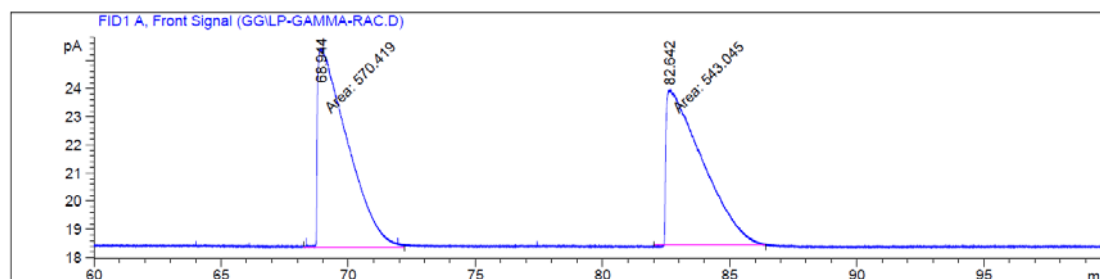

| Peak # | RetTime [min] | Type | Width [min] | Area [pA*s] | Height [pA] | Area %   |
|--------|---------------|------|-------------|-------------|-------------|----------|
| 1      | 68.944        | MM T | 1.3401      | 570.41864   | 7.09408     | 51.22921 |
| 2      | 82.642        | MM T | 1.6421      | 543.04492   | 5.51167     | 48.77079 |

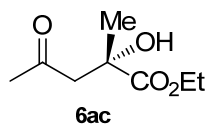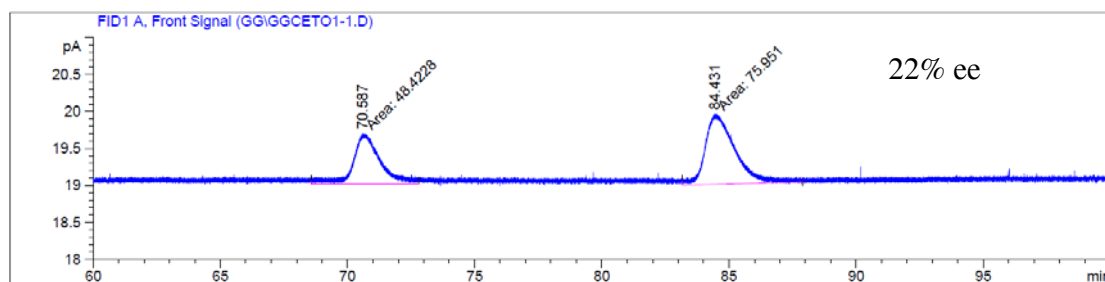

| Peak # | RetTime [min] | Type | Width [min] | Area [pA*s] | Height [pA] | Area %   |
|--------|---------------|------|-------------|-------------|-------------|----------|
| 1      | 70.587        | MM   | 1.1905      | 48.42283    | 6.77880e-1  | 38.93331 |
| 2      | 84.431        | MM   | 1.3233      | 75.95096    | 9.56608e-1  | 61.06669 |

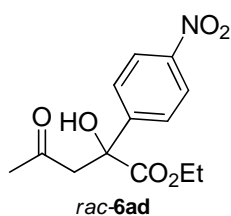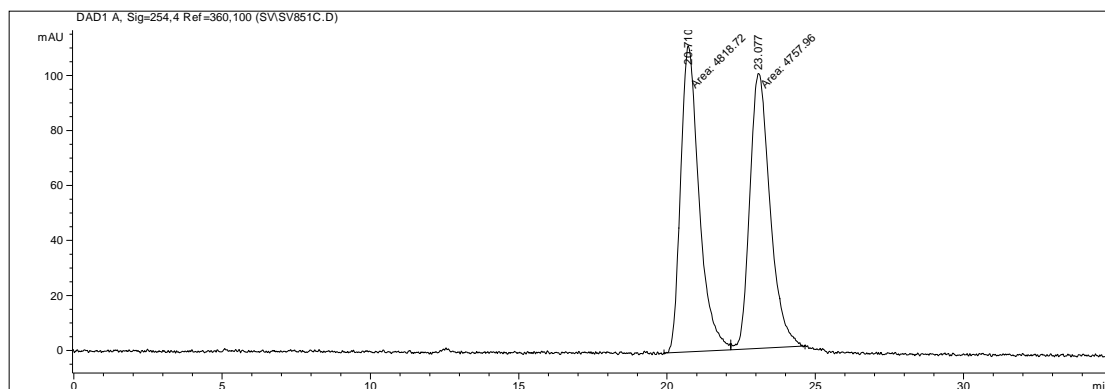

| Peak # | RetTime [min] | Type | Width [min] | Area [mAU*s] | Height [mAU] | Area %  |
|--------|---------------|------|-------------|--------------|--------------|---------|
| 1      | 20.710        | MF T | 0.7215      | 4818.72217   | 111.31969    | 50.3172 |
| 2      | 23.077        | FM T | 0.8333      | 4757.96289   | 99.91671     | 49.6828 |

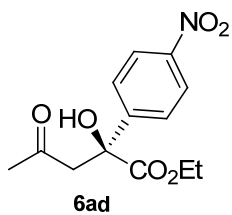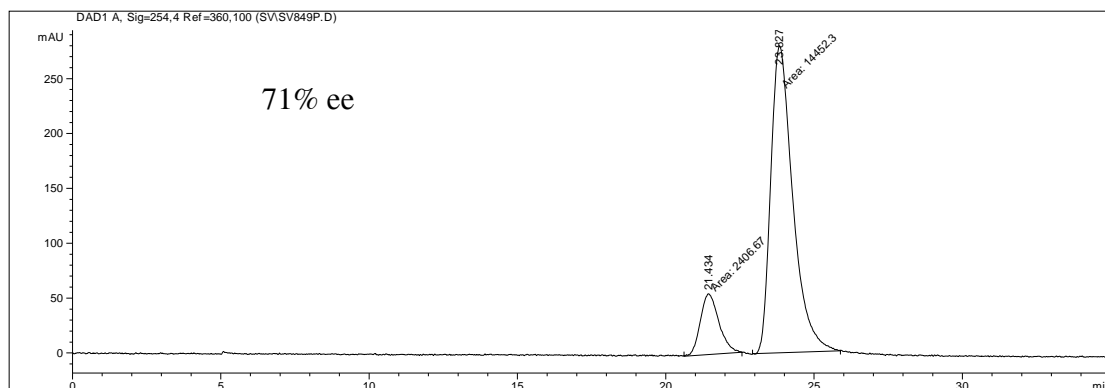

| Peak # | RetTime [min] | Type | Width [min] | Area [mAU*s] | Height [mAU] | Area %  |
|--------|---------------|------|-------------|--------------|--------------|---------|
| 1      | 21.434        | MM T | 0.7246      | 2406.66821   | 55.35408     | 14.2753 |
| 2      | 23.827        | MM T | 0.8610      | 1.44523e4    | 279.74390    | 85.7247 |

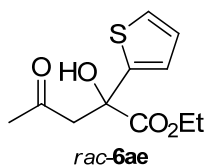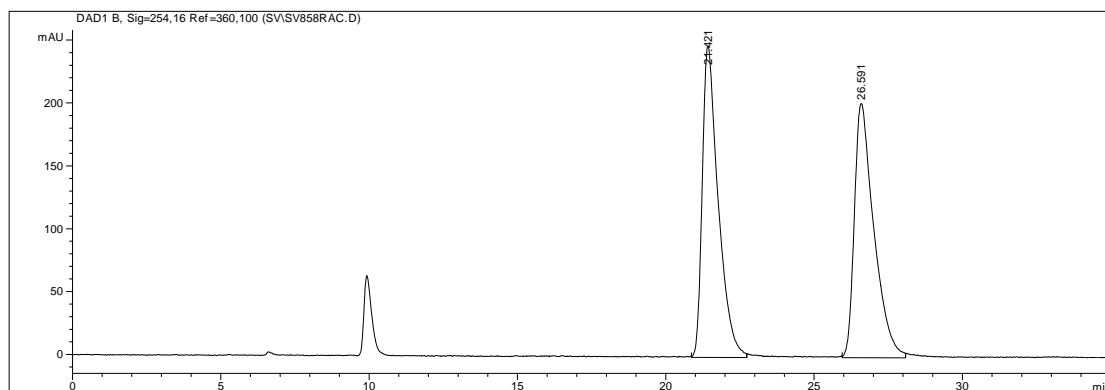

| Peak # | RetTime [min] | Type | Width [min] | Area [mAU*s] | Height [mAU] | Area %  |
|--------|---------------|------|-------------|--------------|--------------|---------|
| 1      | 21.421        | VV   | 0.5157      | 9253.93164   | 247.79085    | 50.0575 |
| 2      | 26.591        | VV   | 0.6307      | 9232.67383   | 202.20561    | 49.9425 |

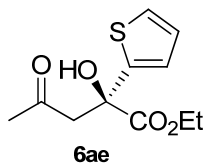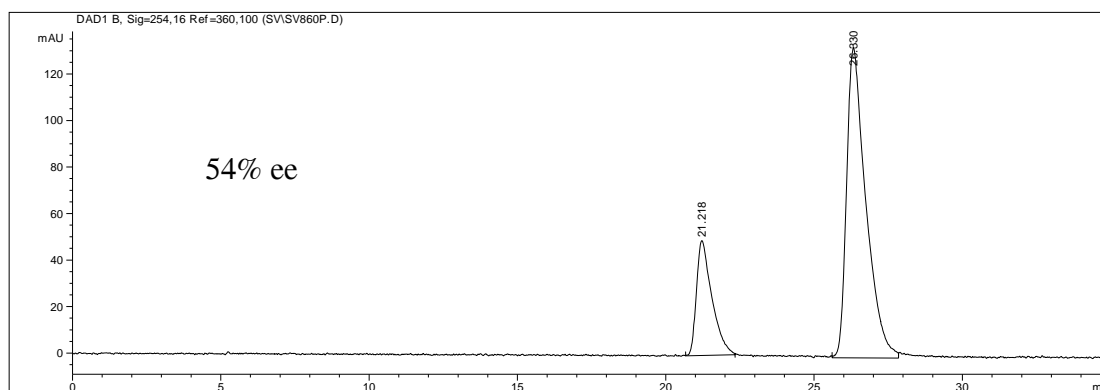

| Peak # | RetTime [min] | Type | Width [min] | Area [mAU*s] | Height [mAU] | Area %  |
|--------|---------------|------|-------------|--------------|--------------|---------|
| 1      | 21.218        | VB   | 0.4577      | 1786.98254   | 49.44181     | 22.8817 |
| 2      | 26.330        | VV   | 0.5895      | 6022.67578   | 133.69775    | 77.1183 |

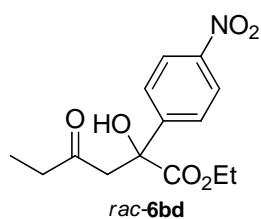

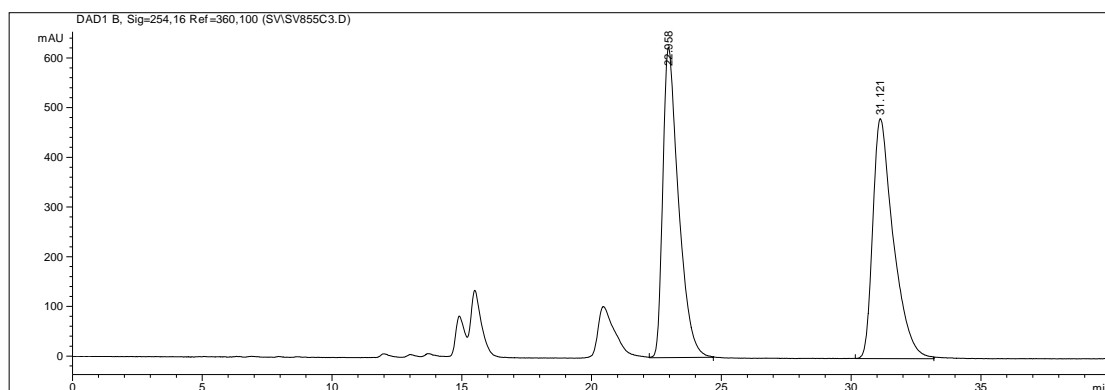

| Peak # | RetTime [min] | Type | Width [min] | Area [mAU*s] | Height [mAU] | Area %  |
|--------|---------------|------|-------------|--------------|--------------|---------|
| 1      | 22.958        | VB   | 0.5798      | 2.62197e4    | 624.54053    | 49.5557 |
| 2      | 31.121        | VB   | 0.7563      | 2.66898e4    | 483.26413    | 50.4443 |

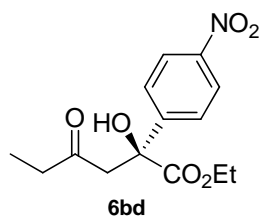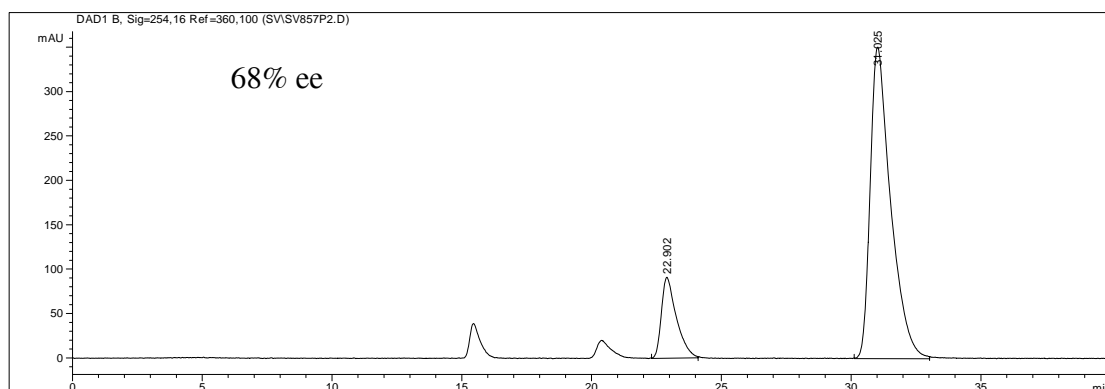

| Peak # | RetTime [min] | Type | Width [min] | Area [mAU*s] | Height [mAU] | Area %  |
|--------|---------------|------|-------------|--------------|--------------|---------|
| 1      | 22.902        | VV   | 0.5428      | 3665.29224   | 91.21157     | 16.0235 |
| 2      | 31.025        | VB   | 0.7286      | 1.92092e4    | 350.96045    | 83.9765 |

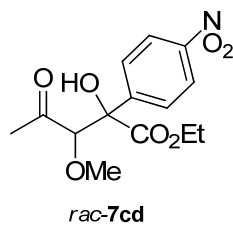



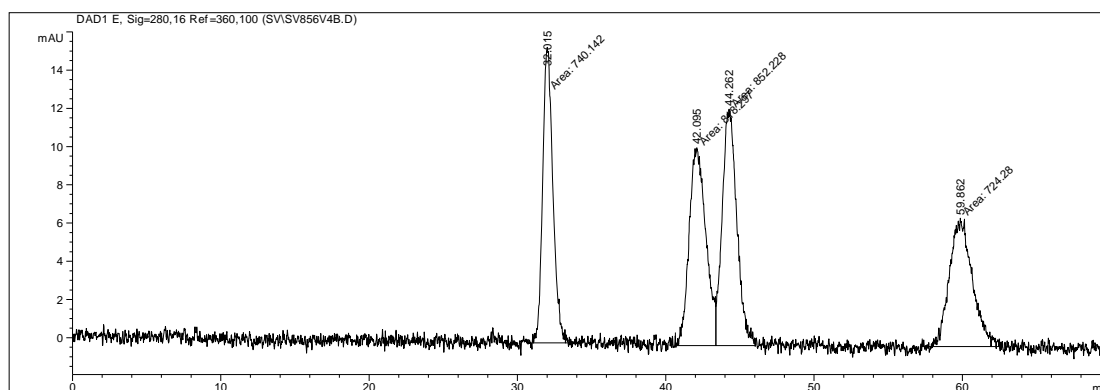

| Peak # | RetTime [min] | Type | Width [min] | Area [mAU*s] | Height [mAU] | Area %  |
|--------|---------------|------|-------------|--------------|--------------|---------|
| 1      | 32.015        | MM T | 0.7976      | 740.14203    | 15.46687     | 23.6094 |
| 2      | 42.095        | MF T | 1.3163      | 818.29742    | 10.36124     | 26.1024 |
| 3      | 44.262        | FM T | 1.1484      | 852.22754    | 12.36825     | 27.1847 |
| 4      | 59.862        | MM T | 1.7958      | 724.28033    | 6.72205      | 23.1034 |

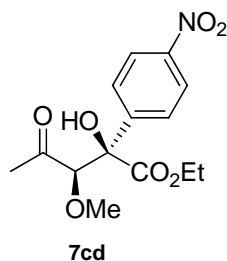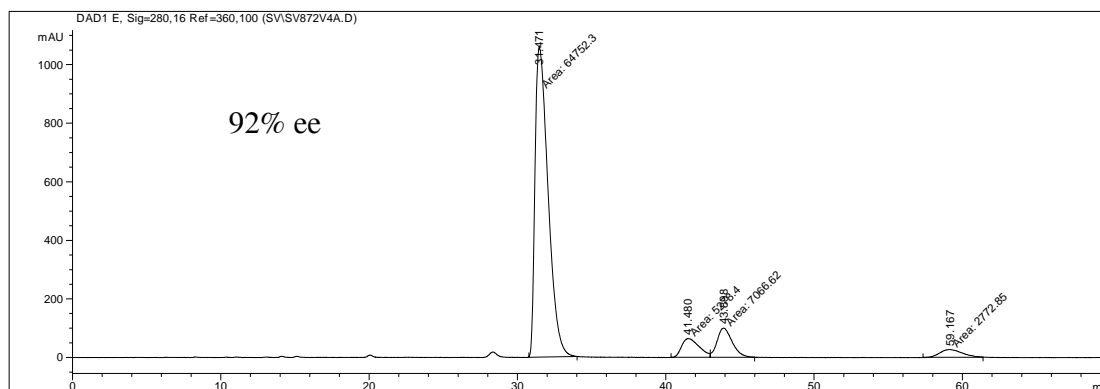

| Peak # | RetTime [min] | Type | Width [min] | Area [mAU*s] | Height [mAU] | Area %  |
|--------|---------------|------|-------------|--------------|--------------|---------|
| 1      | 31.471        | MM T | 1.0154      | 6.47523e4    | 1062.88794   | 81.0720 |
| 2      | 41.480        | MF T | 1.3689      | 5278.40283   | 64.26523     | 6.6087  |
| 3      | 43.898        | FM T | 1.1787      | 7066.62012   | 99.92454     | 8.8476  |
| 4      | 59.167        | MM T | 1.7235      | 2772.84619   | 26.81349     | 3.4717  |

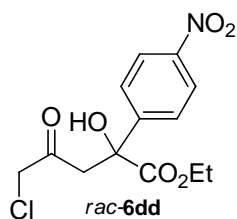

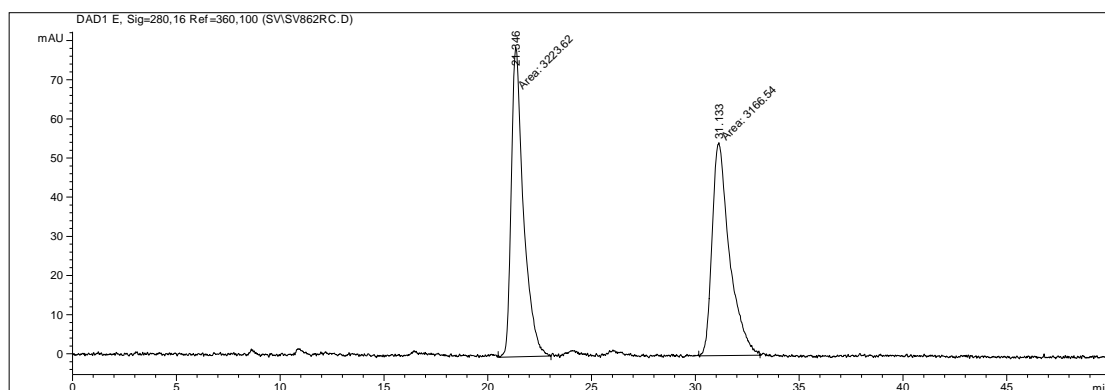

| Peak # | RetTime [min] | Type | Width [min] | Area [mAU*s] | Height [mAU] | Area %  |
|--------|---------------|------|-------------|--------------|--------------|---------|
| 1      | 21.346        | MM T | 0.6796      | 3223.62183   | 79.05855     | 50.4467 |
| 2      | 31.133        | MM T | 0.9704      | 3166.53564   | 54.38551     | 49.5533 |

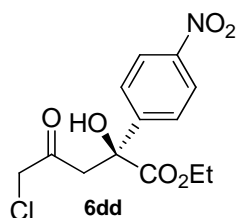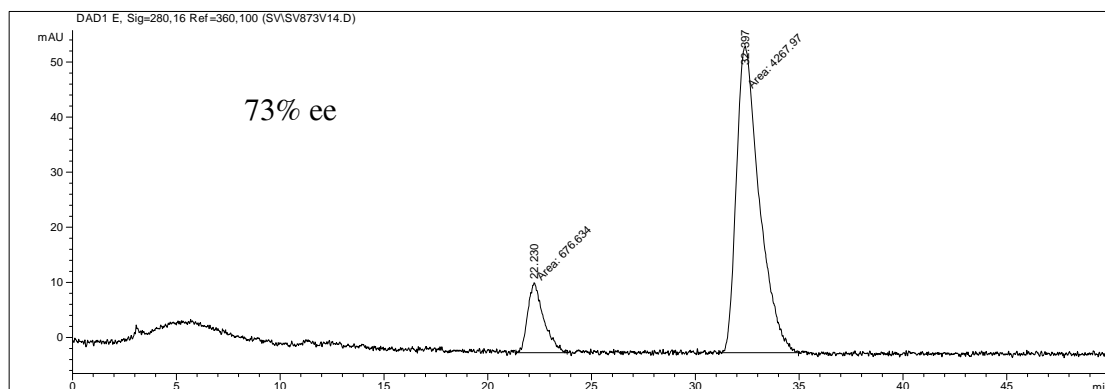

| Peak # | RetTime [min] | Type | Width [min] | Area [mAU*s] | Height [mAU] | Area %  |
|--------|---------------|------|-------------|--------------|--------------|---------|
| 1      | 22.230        | MM T | 0.8874      | 676.63385    | 12.70885     | 13.6843 |
| 2      | 32.397        | MM T | 1.2777      | 4267.97266   | 55.67236     | 86.3157 |

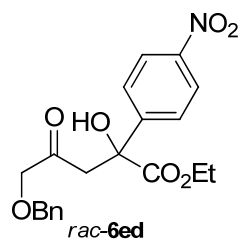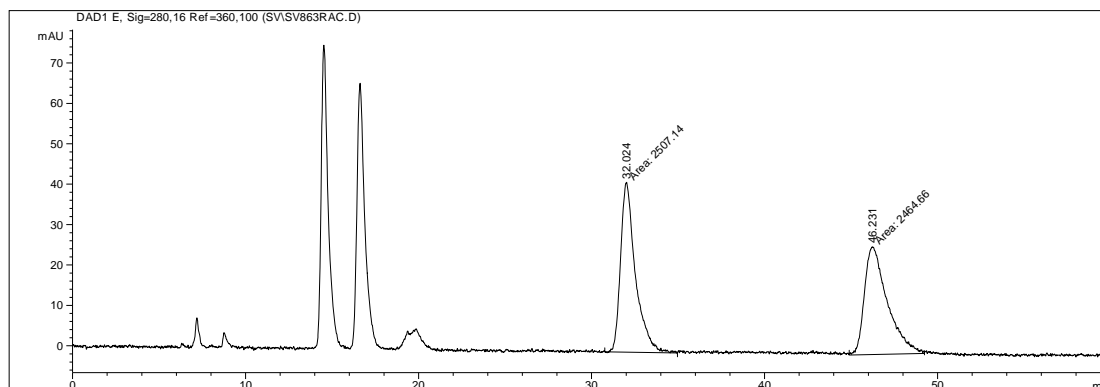

| Peak # | RetTime [min] | Type | Width [min] | Area [mAU*s] | Height [mAU] | Area %  |
|--------|---------------|------|-------------|--------------|--------------|---------|
| 1      | 32.024        | MM T | 1.0769      | 2507.14087   | 42.03511     | 50.4273 |
| 2      | 46.231        | MM T | 1.5428      | 2464.65576   | 26.62500     | 49.5727 |

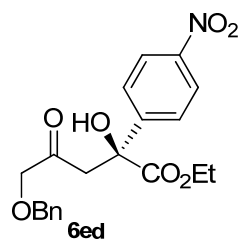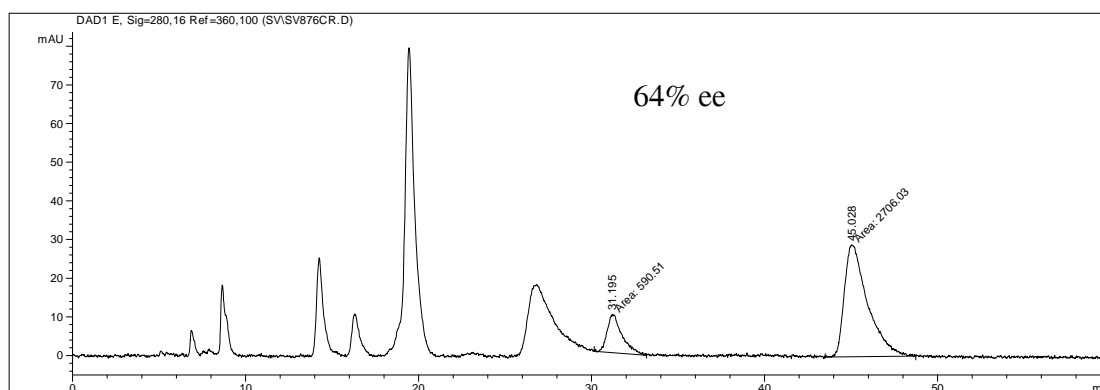

| Peak # | RetTime [min] | Type | Width [min] | Area [mAU*s] | Height [mAU] | Area %  |
|--------|---------------|------|-------------|--------------|--------------|---------|
| 1      | 31.195        | MM T | 0.9908      | 590.50989    | 9.93366      | 17.9130 |
| 2      | 45.028        | MM T | 1.5558      | 2706.02930   | 28.98879     | 82.0870 |

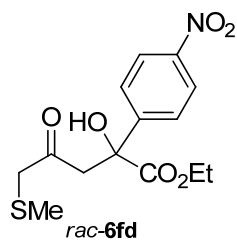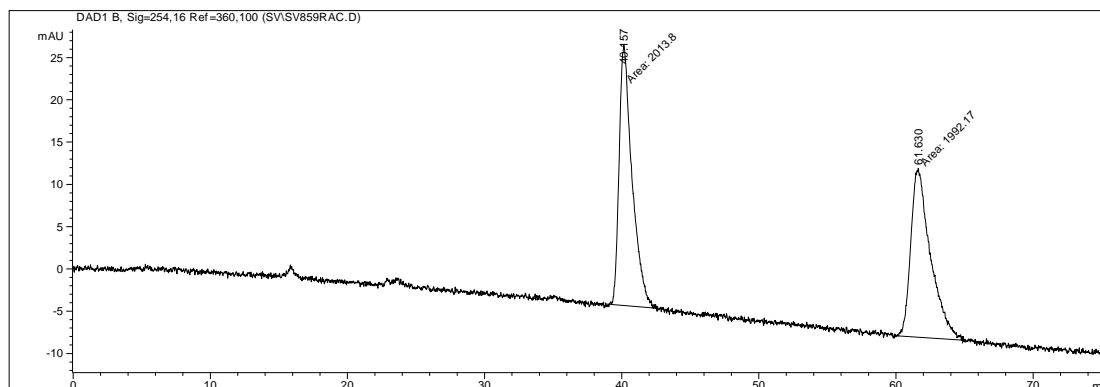

| Peak # | RetTime [min] | Type | Width [min] | Area [mAU*s] | Height [mAU] | Area %  |
|--------|---------------|------|-------------|--------------|--------------|---------|
| 1      | 40.157        | MM T | 1.0902      | 2013.80115   | 30.78527     | 50.2700 |
| 2      | 61.630        | MM T | 1.6626      | 1992.17163   | 19.97056     | 49.7300 |

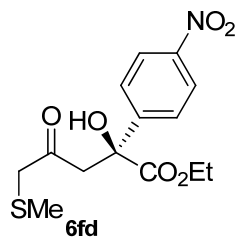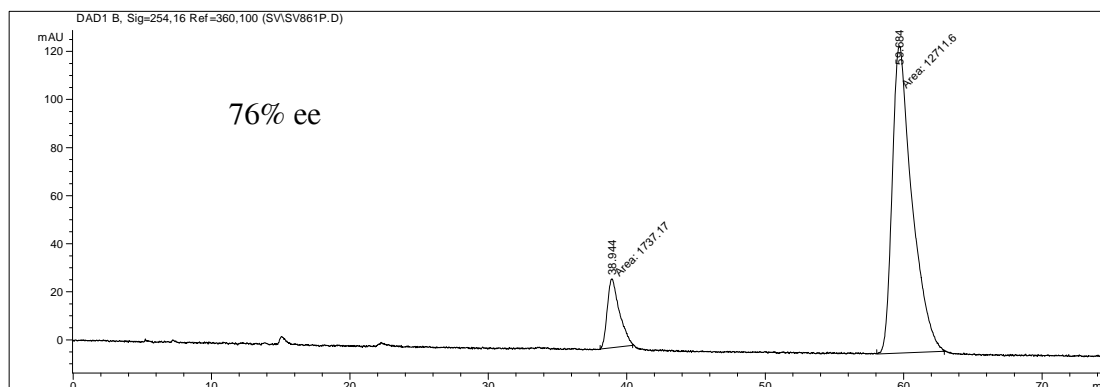

| Peak # | RetTime [min] | Type | Width [min] | Area [mAU*s] | Height [mAU] | Area %  |
|--------|---------------|------|-------------|--------------|--------------|---------|
| 1      | 38.944        | MM T | 1.0130      | 1737.17407   | 28.58001     | 12.0230 |
| 2      | 59.684        | MM T | 1.6577      | 1.27116e4    | 127.80547    | 87.9770 |

## Computational Methods:

All structures were optimized using the functional B3LYP<sup>5</sup> and the 6-311+G\*\* basis set as implemented in Gaussian 09,<sup>6</sup> including polarization functions for the better description of hydrogen bonds involved in the reaction. The solvation factors were introduced with the IEF-PCM method.<sup>7</sup> As the reactions are run in solvent free conditions, we chose acetone as the model solvent, since it is the major substrate in the reaction mixture, sometimes used in a 5:1 relation to the electrophile.

The stationary points were characterized by frequency calculations in order to verify that they have the right number of imaginary frequencies.

The intrinsic reaction coordinates (IRC)<sup>8</sup> were followed to verify the energy profiles connecting each TS to the correct associated local minima.

It was assumed that the reaction is initiated with the formation of an enamine between catalyst **1a** (or **1b**) and acetone, and subsequent protonation of one of the pyrrolidine rings with the acetic acid additive (Figure S1). Next, the nucleophilic attack of the enamine (**8a** or **8b**) to the ketoester **5a** should lead to the C-C bond formation. We computed the transition states for that transformation. The activation energies were measured relative to the sum of the enamines **8a** or **8b** and ketoester **5a**, which was taken as G=0.

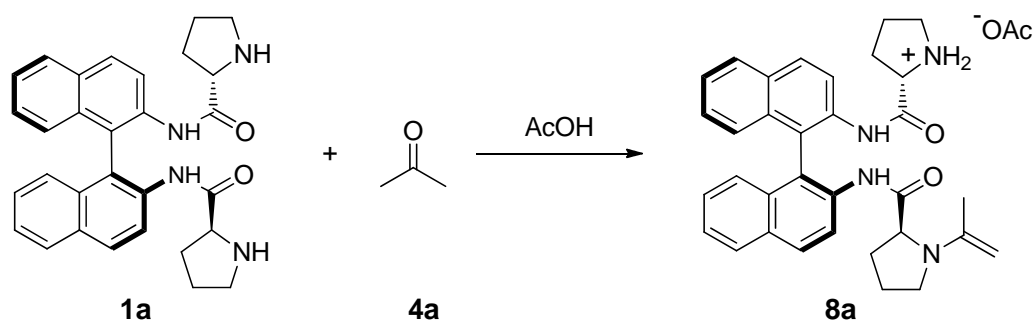

**Figure S1.** Formation of the reactive enamine **8a** (or **8b**) by reaction of the catalyst **1a** (or **1b**) with acetone and subsequent protonation with acetic acid.

We computed four families of transition states, corresponding to the diastereoisomeric transition states of enamines **8a** and **8b** through the *Re* and *Si* faces of the ketoester **5a**. In each family, several H-bonding patterns between the 4 NH groups of the catalyst and the two carbonyl oxygens in **5a** were screened and evaluated. In the following description and in the Main Text, only the most stable complexes and transition states of each set of conformational structures are shown. Other higher-lying conformational structures were computed in each case.

We found that the activation energy is related to the disposition of the phenyl group during the transition state. When it adopts an inward position with respect to the bulky substituents of the catalyst

(**TS-1a-S** and **TS-1b-R**) the energy was always higher than the cases where the phenyl is positioned in the more free outward area (**TS-1a-R** and **TS-1b-S**).

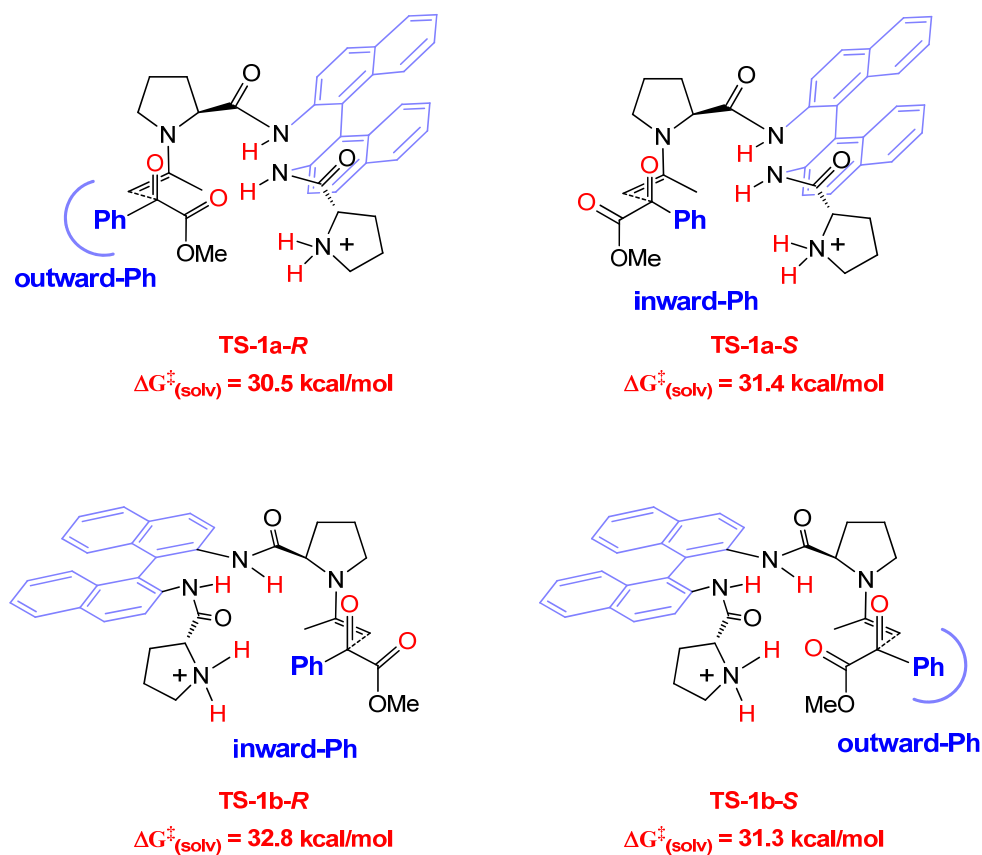

**Figure S2.** Four families of transition structures computed for the reaction of enamines **8a** and **8b** with ketoester **5a**

**Table S1.** Energies of the structures involved in the computational study

|                       | <b>G</b> (B3LYP/6-311+G**, IEF-PCM, Acetone) | relative <b>G</b> | Frequenc<br>y |
|-----------------------|----------------------------------------------|-------------------|---------------|
| Enamine <b>8a</b>     | -1647.831185                                 |                   |               |
| Enamine <b>8b</b>     | -1647.827526                                 |                   |               |
| Ketoester <b>5a</b>   | -573.498167                                  |                   |               |
| <b>8a</b> + <b>5a</b> | -2221.329352                                 | 0                 |               |
| <b>8b</b> + <b>5a</b> | -2221.325693                                 | 0                 |               |

|                |              |       |        |
|----------------|--------------|-------|--------|
| <b>TS-1a-R</b> | -2221.280690 | 30.54 | -162.0 |
| <b>TS-1a-S</b> | -2221.279246 | 31.44 | -170.7 |
| <b>TS-1b-R</b> | -2221.273374 | 32.83 | -202.1 |
| <b>TS-1b-S</b> | -2221.275823 | 31.29 | -218.4 |

## Cartesian Coordinates of the structures involved in the computational study

### Enamine 8a

Standard orientation:

| -----  |        |        |                         |           |           |  |
|--------|--------|--------|-------------------------|-----------|-----------|--|
| Center | Atomic | Atomic | Coordinates (Angstroms) |           |           |  |
| Number | Number | Type   | X                       | Y         | Z         |  |
| -----  |        |        |                         |           |           |  |
| 1      | 6      | 0      | -3.584429               | 1.598048  | 2.692892  |  |
| 2      | 1      | 0      | -0.799221               | -1.877205 | -4.281317 |  |
| 3      | 1      | 0      | 1.799521                | 0.913419  | -0.435348 |  |
| 4      | 1      | 0      | 0.421142                | 0.627721  | 3.543063  |  |
| 5      | 1      | 0      | 2.746237                | 0.012322  | 4.115307  |  |
| 6      | 1      | 0      | -1.542438               | -5.976713 | -1.958321 |  |
| 7      | 1      | 0      | -5.440554               | -0.356447 | 1.766505  |  |
| 8      | 1      | 0      | -1.446564               | -4.169098 | -3.644505 |  |
| 9      | 1      | 0      | -3.000233               | -0.283388 | 3.619905  |  |
| 10     | 1      | 0      | 5.308017                | -2.991774 | -0.304871 |  |
| 11     | 1      | 0      | -4.661319               | 0.185416  | 3.998061  |  |
| 12     | 1      | 0      | 0.416220                | -3.453030 | 0.916101  |  |
| 13     | 1      | 0      | -2.920389               | 2.179985  | 3.335306  |  |
| 14     | 1      | 0      | -0.609746               | -5.606999 | 0.319703  |  |
| 15     | 1      | 0      | -4.509241               | 2.168300  | 2.558715  |  |
| 16     | 1      | 0      | 3.003060                | -2.382965 | -0.903035 |  |
| 17     | 1      | 0      | -3.171369               | 2.155075  | 0.621935  |  |

|    |   |   |           |           |           |
|----|---|---|-----------|-----------|-----------|
| 18 | 1 | 0 | 4.868526  | -1.090831 | 3.525929  |
| 19 | 1 | 0 | 6.251604  | -2.355257 | 1.909751  |
| 20 | 1 | 0 | -3.561433 | 0.319549  | -2.516879 |
| 21 | 1 | 0 | -2.212953 | 0.674661  | -1.433301 |
| 22 | 1 | 0 | -5.127848 | -1.248338 | -1.848598 |
| 23 | 1 | 0 | -5.390680 | -1.715542 | -0.085037 |
| 24 | 1 | 0 | -4.220728 | -1.617832 | 1.993287  |
| 25 | 1 | 0 | -1.522342 | -0.697706 | 1.010636  |
| 26 | 1 | 0 | 3.102770  | 3.052409  | -1.292987 |
| 27 | 1 | 0 | 1.811146  | 6.285546  | -0.985250 |
| 28 | 1 | 0 | 0.304115  | 6.056385  | -1.906429 |
| 29 | 1 | 0 | -0.446593 | 4.293777  | -0.338623 |
| 30 | 1 | 0 | 0.329582  | 5.424982  | 0.766738  |
| 31 | 1 | 0 | 1.181555  | 2.898486  | 0.769317  |
| 32 | 1 | 0 | 2.434206  | 4.158495  | 0.709265  |
| 33 | 1 | 0 | -3.623855 | 1.739607  | -1.474027 |
| 34 | 1 | 0 | 1.102478  | 4.059696  | -2.838463 |
| 35 | 1 | 0 | 2.577616  | 4.849060  | -2.594548 |
| 36 | 6 | 0 | -3.304327 | 0.691727  | -1.524444 |
| 37 | 6 | 0 | -1.424213 | 1.268177  | 1.426720  |
| 38 | 1 | 0 | 0.201198  | 0.302791  | -3.711608 |
| 39 | 6 | 0 | -4.370363 | -0.533982 | 1.949879  |
| 40 | 6 | 0 | -3.974835 | -0.155411 | -0.469373 |
| 41 | 6 | 0 | -4.883693 | -1.088012 | -0.806197 |
| 42 | 6 | 0 | -3.900806 | 0.190151  | 3.213832  |
| 43 | 6 | 0 | -2.958303 | 1.326695  | 1.301919  |
| 44 | 6 | 0 | -0.459674 | -2.758902 | -2.335789 |
| 45 | 6 | 0 | 0.479720  | -0.293367 | 1.587914  |
| 46 | 6 | 0 | 3.131723  | -1.001214 | 2.241424  |
| 47 | 6 | 0 | 1.036000  | 0.077236  | 2.840973  |
| 48 | 6 | 0 | 1.233088  | -0.991755 | 0.649346  |
| 49 | 6 | 0 | 2.327180  | -0.266053 | 3.152479  |
| 50 | 6 | 0 | 0.660795  | -1.275585 | -0.706541 |
| 51 | 6 | 0 | -0.395780 | -1.708761 | -3.287141 |
| 52 | 6 | 0 | 2.582155  | -1.371709 | 0.969210  |
| 53 | 6 | 0 | 0.079121  | -2.542425 | -1.024313 |
| 54 | 6 | 0 | 0.688024  | -0.280000 | -1.680673 |
| 55 | 6 | 0 | 0.163842  | -0.492415 | -2.980412 |



|    |   |   |           |           |           |
|----|---|---|-----------|-----------|-----------|
| 56 | 6 | 0 | -1.042096 | -4.015392 | -2.648127 |
| 57 | 6 | 0 | -1.095136 | -5.019700 | -1.709487 |
| 58 | 6 | 0 | 0.007552  | -3.602428 | -0.077612 |
| 59 | 6 | 0 | -0.565158 | -4.808235 | -0.414129 |
| 60 | 6 | 0 | 3.406322  | -2.092649 | 0.060910  |
| 61 | 6 | 0 | 4.465837  | -1.371262 | 2.556637  |
| 62 | 6 | 0 | 5.234311  | -2.073757 | 1.656943  |
| 63 | 6 | 0 | 4.697222  | -2.434558 | 0.398759  |
| 64 | 6 | 0 | 1.212023  | 2.154732  | -1.906472 |
| 65 | 6 | 0 | 2.037982  | 3.290952  | -1.235545 |
| 66 | 6 | 0 | 1.051724  | 5.560749  | -1.285806 |
| 67 | 6 | 0 | 0.503044  | 4.777966  | -0.094666 |
| 68 | 6 | 0 | 1.585316  | 3.721075  | 0.174164  |
| 69 | 7 | 0 | 1.304418  | 0.955569  | -1.320337 |
| 70 | 7 | 0 | -0.879205 | 0.024263  | 1.323895  |
| 71 | 7 | 0 | 1.747109  | 4.494586  | -2.119736 |
| 72 | 7 | 0 | -3.567811 | 0.061216  | 0.863809  |
| 73 | 8 | 0 | -0.771742 | 2.291462  | 1.642071  |
| 74 | 8 | 0 | 0.568233  | 2.438088  | -2.927502 |

---

## Enamine 8b

Standard orientation:

---

| Center<br>Number | Atomic<br>Number | Atomic<br>Type | Coordinates (Angstroms) |          |           |
|------------------|------------------|----------------|-------------------------|----------|-----------|
|                  |                  |                | X                       | Y        | Z         |
| 1                | 1                | 0              | 1.535229                | 3.751368 | 0.162759  |
| 2                | 1                | 0              | 1.879176                | 3.512741 | -1.396169 |
| 3                | 1                | 0              | -4.100731               | 0.777385 | -2.230021 |
| 4                | 1                | 0              | 5.136208                | 2.811189 | 0.607104  |
| 5                | 1                | 0              | 5.101837                | 1.962231 | -0.944412 |
| 6                | 1                | 0              | 5.462320                | 4.713941 | -0.853875 |
| 7                | 1                | 0              | 4.488336                | 3.991206 | -2.139984 |
| 8                | 1                | 0              | 2.884341                | 5.561770 | -1.104378 |
| 9                | 1                | 0              | 3.445128                | 5.113216 | 0.527986  |

|    |   |   |           |           |           |
|----|---|---|-----------|-----------|-----------|
| 10 | 1 | 0 | 2.941214  | 2.134970  | 0.938845  |
| 11 | 1 | 0 | -1.377502 | 1.302852  | 0.768547  |
| 12 | 1 | 0 | -3.125945 | 3.574902  | 1.592982  |
| 13 | 1 | 0 | -3.543381 | 4.482987  | -0.587534 |
| 14 | 1 | 0 | -3.287908 | 4.011307  | -2.340561 |
| 15 | 1 | 0 | -2.403262 | 0.602319  | -1.770072 |
| 16 | 1 | 0 | -2.877517 | 1.801895  | -2.990049 |
| 17 | 1 | 0 | 4.818603  | -3.511194 | 2.820172  |
| 18 | 1 | 0 | 3.313311  | -2.192824 | 4.276409  |
| 19 | 1 | 0 | -4.327098 | 0.019732  | -0.152235 |
| 20 | 1 | 0 | 2.416156  | -2.539719 | -0.605136 |
| 21 | 1 | 0 | -5.888620 | 0.889964  | 1.442131  |
| 22 | 1 | 0 | -2.012998 | -5.190599 | -0.357896 |
| 23 | 1 | 0 | -4.886465 | -0.145180 | 2.478717  |
| 24 | 1 | 0 | -0.868591 | -3.250258 | 0.626505  |
| 25 | 1 | 0 | -5.134141 | 2.489510  | 3.163565  |
| 26 | 1 | 0 | 4.359795  | -3.671978 | 0.376050  |
| 27 | 1 | 0 | -3.511794 | 1.787169  | 3.167756  |
| 28 | 1 | 0 | -1.429069 | -3.593523 | -4.309037 |
| 29 | 1 | 0 | -4.802891 | 3.534335  | 1.018949  |
| 30 | 1 | 0 | -2.294379 | -5.374985 | -2.825908 |
| 31 | 1 | 0 | 1.321926  | -0.777420 | 4.562945  |
| 32 | 1 | 0 | -0.660133 | 0.353249  | 3.590836  |
| 33 | 1 | 0 | 0.700975  | 1.720111  | -0.692923 |
| 34 | 1 | 0 | -0.266226 | -1.446741 | -4.609580 |
| 35 | 1 | 0 | 0.884782  | 0.531021  | -3.628358 |
| 36 | 8 | 0 | 3.491450  | 0.312221  | -1.340178 |
| 37 | 8 | 0 | -2.858069 | -1.396415 | 1.545384  |
| 38 | 7 | 0 | -3.596595 | 1.967464  | 0.279298  |
| 39 | 7 | 0 | 2.340180  | 3.606548  | -0.463372 |
| 40 | 7 | 0 | -1.440233 | 0.338117  | 1.078928  |
| 41 | 7 | 0 | 1.322232  | 0.996330  | -1.056348 |
| 42 | 6 | 0 | 4.613343  | 2.737519  | -0.351104 |
| 43 | 6 | 0 | 4.574892  | 4.109384  | -1.053333 |
| 44 | 6 | 0 | 3.310009  | 4.760804  | -0.497895 |
| 45 | 6 | 0 | 3.139074  | 2.347147  | -0.114574 |
| 46 | 6 | 0 | 2.670511  | 1.113827  | -0.928277 |
| 47 | 6 | 0 | 3.690625  | -3.099311 | 1.012782  |

|    |   |   |           |           |           |
|----|---|---|-----------|-----------|-----------|
| 48 | 6 | 0 | 3.954184  | -3.005652 | 2.399806  |
| 49 | 6 | 0 | 3.118693  | -2.272531 | 3.209968  |
| 50 | 6 | 0 | 2.596807  | -2.470667 | 0.460692  |
| 51 | 6 | 0 | -1.616846 | -4.412187 | -1.003682 |
| 52 | 6 | 0 | -0.966377 | -3.332333 | -0.450123 |
| 53 | 6 | 0 | -1.782401 | -4.513727 | -2.405162 |
| 54 | 6 | 0 | -1.301627 | -3.524003 | -3.231481 |
| 55 | 6 | 0 | 0.503040  | -0.266898 | -2.997930 |
| 56 | 6 | 0 | 0.689105  | -0.174222 | -1.598114 |
| 57 | 6 | 0 | -0.446909 | -2.296869 | -1.274532 |
| 58 | 6 | 0 | 1.703883  | -1.715927 | 1.270507  |
| 59 | 6 | 0 | -0.133681 | -1.359616 | -3.533448 |
| 60 | 6 | 0 | 0.247332  | -1.164055 | -0.735190 |
| 61 | 6 | 0 | 1.111893  | -0.848093 | 3.498175  |
| 62 | 6 | 0 | 0.545344  | -1.059439 | 0.730281  |
| 63 | 6 | 0 | 0.016254  | -0.218510 | 2.963108  |
| 64 | 6 | 0 | 1.980790  | -1.611410 | 2.675278  |
| 65 | 6 | 0 | -0.267877 | -0.324962 | 1.578760  |
| 66 | 6 | 0 | -0.628491 | -2.393616 | -2.695967 |
| 67 | 6 | 0 | -3.883486 | 0.573095  | 0.677748  |
| 68 | 6 | 0 | -4.377591 | 2.014406  | 2.534911  |
| 69 | 6 | 0 | -3.236541 | 3.728738  | -1.300006 |
| 70 | 6 | 0 | -3.365170 | 2.381692  | -0.985981 |
| 71 | 6 | 0 | -3.965137 | 2.914076  | 1.362314  |
| 72 | 6 | 0 | -4.878713 | 0.740497  | 1.840796  |
| 73 | 6 | 0 | -2.666357 | -0.259579 | 1.143029  |
| 74 | 6 | 0 | -3.171377 | 1.331986  | -2.050578 |

---

## 5a

Standard orientation:

---

| Center | Atomic | Atomic | Coordinates (Angstroms) |   |   |
|--------|--------|--------|-------------------------|---|---|
| Number | Number | Type   | X                       | Y | Z |

---

|    |   |   |           |           |           |
|----|---|---|-----------|-----------|-----------|
| 1  | 1 | 0 | 3.753128  | -1.500792 | -0.782212 |
| 2  | 1 | 0 | 4.325710  | -0.531495 | 0.594907  |
| 3  | 1 | 0 | 4.664520  | 0.018345  | -1.079339 |
| 4  | 1 | 0 | -4.526954 | -0.959296 | -0.285709 |
| 5  | 1 | 0 | -2.668210 | -2.604375 | -0.239892 |
| 6  | 1 | 0 | -4.039661 | 1.471589  | -0.113878 |
| 7  | 1 | 0 | -1.675458 | 2.244778  | 0.097382  |
| 8  | 1 | 0 | -0.329177 | -1.831013 | -0.009126 |
| 9  | 8 | 0 | 2.750961  | 0.311134  | -0.488189 |
| 10 | 8 | 0 | 1.730679  | -1.186491 | 0.865133  |
| 11 | 8 | 0 | 0.756459  | 2.008901  | 0.214806  |
| 12 | 6 | 0 | 3.950287  | -0.484973 | -0.429699 |
| 13 | 6 | 0 | 1.717072  | -0.160746 | 0.216969  |
| 14 | 6 | 0 | -2.456289 | -1.542358 | -0.167889 |
| 15 | 6 | 0 | -3.227726 | 0.751748  | -0.094594 |
| 16 | 6 | 0 | -1.914084 | 1.189565  | 0.024131  |
| 17 | 6 | 0 | -1.136471 | -1.110155 | -0.045246 |
| 18 | 6 | 0 | -3.500619 | -0.616655 | -0.192047 |
| 19 | 6 | 0 | -0.855904 | 0.263419  | 0.051605  |
| 20 | 6 | 0 | 0.522286  | 0.814140  | 0.150748  |

---

### TS-1a-R

Standard orientation:

---

| Center<br>Number | Atomic<br>Number | Atomic<br>Type | Coordinates (Angstroms) |           |           |
|------------------|------------------|----------------|-------------------------|-----------|-----------|
|                  |                  |                | X                       | Y         | Z         |
| 1                | 6                | 0              | 2.663016                | -1.950577 | -3.139300 |
| 2                | 6                | 0              | -0.702237               | -2.120912 | -2.103506 |
| 3                | 6                | 0              | -0.238207               | -4.419307 | -1.135396 |
| 4                | 6                | 0              | 1.504137                | -3.441294 | 0.213321  |
| 5                | 6                | 0              | 2.667756                | -2.323904 | -1.678604 |
| 6                | 6                | 0              | 3.764425                | -2.009081 | -0.874908 |
| 7                | 6                | 0              | 0.104085                | -4.059461 | 0.317463  |
| 8                | 6                | 0              | 0.351573                | -3.241298 | -1.936418 |
| 9                | 6                | 0              | -3.410484               | -2.298707 | 2.049844  |

|    |   |   |           |           |           |
|----|---|---|-----------|-----------|-----------|
| 10 | 6 | 0 | -1.399082 | 0.134823  | -1.495079 |
| 11 | 6 | 0 | -3.155754 | 2.328954  | -1.738080 |
| 12 | 6 | 0 | -1.404724 | 0.929881  | -2.672570 |
| 13 | 6 | 0 | -2.266306 | 0.405215  | -0.442133 |
| 14 | 6 | 0 | -2.265664 | 1.993494  | -2.793457 |
| 15 | 6 | 0 | -2.322615 | -0.481418 | 0.767865  |
| 16 | 6 | 0 | -2.494488 | -2.064219 | 3.108863  |
| 17 | 6 | 0 | -3.155510 | 1.533109  | -0.542471 |
| 18 | 6 | 0 | -3.324436 | -1.505006 | 0.856516  |
| 19 | 6 | 0 | -1.440992 | -0.308237 | 1.825666  |
| 20 | 6 | 0 | -1.525126 | -1.097227 | 2.997460  |
| 21 | 6 | 0 | -4.409134 | -3.305045 | 2.142928  |
| 22 | 6 | 0 | -5.280817 | -3.531139 | 1.102997  |
| 23 | 6 | 0 | -4.233763 | -1.775104 | -0.204145 |
| 24 | 6 | 0 | -5.185099 | -2.763044 | -0.081964 |
| 25 | 6 | 0 | -4.047790 | 1.891231  | 0.506467  |
| 26 | 6 | 0 | -4.045693 | 3.432141  | -1.840470 |
| 27 | 6 | 0 | -4.901419 | 3.743383  | -0.808976 |
| 28 | 6 | 0 | -4.897349 | 2.966605  | 0.374121  |
| 29 | 6 | 0 | -0.531125 | 1.984883  | 1.938641  |
| 30 | 6 | 0 | 0.633723  | 2.819314  | 1.346646  |
| 31 | 6 | 0 | 0.337388  | 4.107474  | -0.744966 |
| 32 | 6 | 0 | -0.245902 | 4.888321  | 0.430632  |
| 33 | 6 | 0 | 0.514430  | 4.319194  | 1.640129  |
| 34 | 1 | 0 | -0.822331 | -0.910956 | 3.803530  |
| 35 | 1 | 0 | -2.571238 | -2.661879 | 4.013365  |
| 36 | 1 | 0 | 0.504064  | 0.326639  | 1.310338  |
| 37 | 1 | 0 | -0.730155 | 0.663474  | -3.479955 |
| 38 | 1 | 0 | -2.283452 | 2.583688  | -3.706367 |
| 39 | 1 | 0 | -6.041269 | -4.302246 | 1.185631  |
| 40 | 1 | 0 | 2.292744  | -4.199095 | 0.305874  |
| 41 | 1 | 0 | -4.471076 | -3.894374 | 3.054271  |
| 42 | 1 | 0 | -0.609252 | -3.327616 | 0.709283  |
| 43 | 1 | 0 | -5.569302 | 3.223876  | 1.187431  |
| 44 | 1 | 0 | 0.094411  | -4.925349 | 0.984230  |
| 45 | 1 | 0 | -4.159943 | -1.207829 | -1.125058 |
| 46 | 1 | 0 | -1.306936 | -4.529100 | -1.327114 |
| 47 | 1 | 0 | -5.867226 | -2.957327 | -0.904436 |

|    |   |   |           |           |           |
|----|---|---|-----------|-----------|-----------|
| 48 | 1 | 0 | 0.262848  | -5.347242 | -1.432471 |
| 49 | 1 | 0 | -4.040526 | 1.316775  | 1.424890  |
| 50 | 1 | 0 | 0.625079  | -3.547737 | -2.948196 |
| 51 | 1 | 0 | -4.043903 | 4.020624  | -2.754654 |
| 52 | 1 | 0 | -5.582205 | 4.584851  | -0.899477 |
| 53 | 1 | 0 | 3.583892  | -1.425159 | -3.395188 |
| 54 | 1 | 0 | 1.810058  | -1.310898 | -3.392676 |
| 55 | 1 | 0 | 4.693702  | -1.755577 | -1.367336 |
| 56 | 1 | 0 | 3.861878  | -2.468964 | 0.099839  |
| 57 | 1 | 0 | 1.687255  | -2.659029 | 0.950952  |
| 58 | 1 | 0 | 0.383199  | -0.837845 | -0.890260 |
| 59 | 1 | 0 | 1.597907  | 2.390619  | 1.628302  |
| 60 | 1 | 0 | 1.326616  | 4.471297  | -1.033349 |
| 61 | 1 | 0 | -0.298429 | 4.044060  | -1.628939 |
| 62 | 1 | 0 | -1.317157 | 4.686267  | 0.530932  |
| 63 | 1 | 0 | -0.108666 | 5.965401  | 0.306957  |
| 64 | 1 | 0 | -0.023073 | 4.474287  | 2.576919  |
| 65 | 1 | 0 | 1.509369  | 4.768994  | 1.721495  |
| 66 | 1 | 0 | 2.599700  | -2.844459 | -3.771572 |
| 67 | 1 | 0 | -0.266524 | 2.111289  | -0.442475 |
| 68 | 1 | 0 | 1.369966  | 2.247257  | -0.604184 |
| 69 | 7 | 0 | -0.379022 | 0.651575  | 1.711686  |
| 70 | 7 | 0 | -0.478881 | -0.959495 | -1.422280 |
| 71 | 7 | 0 | 0.530133  | 2.710395  | -0.188885 |
| 72 | 7 | 0 | 1.555025  | -2.873170 | -1.160808 |
| 73 | 8 | 0 | -1.679547 | -2.334859 | -2.803436 |
| 74 | 8 | 0 | -1.492668 | 2.517314  | 2.467110  |
| 75 | 6 | 0 | 3.153553  | -0.035501 | -0.037771 |
| 76 | 8 | 0 | 1.902579  | -0.088293 | 0.164319  |
| 77 | 6 | 0 | 4.104282  | -0.054426 | 1.132790  |
| 78 | 6 | 0 | 5.745898  | -0.050980 | 3.417157  |
| 79 | 6 | 0 | 5.490210  | 0.151262  | 1.017522  |
| 80 | 6 | 0 | 3.557160  | -0.259145 | 2.411326  |
| 81 | 6 | 0 | 4.370071  | -0.257162 | 3.542254  |
| 82 | 6 | 0 | 6.300063  | 0.152605  | 2.152014  |
| 83 | 1 | 0 | 5.941462  | 0.300286  | 0.044071  |
| 84 | 1 | 0 | 2.488481  | -0.415518 | 2.509790  |
| 85 | 1 | 0 | 3.929600  | -0.414699 | 4.522719  |

|    |   |   |          |           |           |
|----|---|---|----------|-----------|-----------|
| 86 | 1 | 0 | 7.369244 | 0.311591  | 2.045567  |
| 87 | 1 | 0 | 6.380820 | -0.050077 | 4.298265  |
| 88 | 6 | 0 | 3.538204 | 0.879544  | -1.227591 |
| 89 | 8 | 0 | 2.819434 | 1.822546  | -1.537590 |
| 90 | 8 | 0 | 4.678831 | 0.622392  | -1.861134 |
| 91 | 6 | 0 | 5.063908 | 1.554194  | -2.904919 |
| 92 | 1 | 0 | 6.011867 | 1.177487  | -3.285603 |
| 93 | 1 | 0 | 5.181855 | 2.555727  | -2.486788 |
| 94 | 1 | 0 | 4.305829 | 1.569960  | -3.690080 |

---

## TS-1a-S

Standard orientation:

---

| Center<br>Number | Atomic<br>Number | Atomic<br>Type | Coordinates (Angstroms) |           |           |
|------------------|------------------|----------------|-------------------------|-----------|-----------|
|                  |                  |                | X                       | Y         | Z         |
| 1                | 6                | 0              | 2.323083                | -1.503543 | -3.137400 |
| 2                | 6                | 0              | -0.926713               | -1.325784 | -1.839945 |
| 3                | 6                | 0              | -0.740824               | -3.770930 | -1.157606 |
| 4                | 6                | 0              | 1.235627                | -3.235392 | 0.123641  |
| 5                | 6                | 0              | 2.392593                | -2.080524 | -1.748088 |
| 6                | 6                | 0              | 3.608525                | -2.085608 | -1.052325 |
| 7                | 6                | 0              | -0.222311               | -3.681390 | 0.284558  |
| 8                | 6                | 0              | -0.042120               | -2.592322 | -1.867807 |
| 9                | 6                | 0              | -4.672400               | -2.071854 | 0.601021  |
| 10               | 6                | 0              | -1.280939               | 0.930962  | -0.966789 |
| 11               | 6                | 0              | -2.620652               | 3.412863  | -0.863538 |
| 12               | 6                | 0              | -0.731957               | 2.077666  | -1.594956 |
| 13               | 6                | 0              | -2.501296               | 0.995424  | -0.301239 |
| 14               | 6                | 0              | -1.381689               | 3.286879  | -1.541564 |
| 15               | 6                | 0              | -3.064223               | -0.202892 | 0.403018  |
| 16               | 6                | 0              | -4.067173               | -2.425212 | 1.835921  |
| 17               | 6                | 0              | -3.192385               | 2.255335  | -0.235617 |
| 18               | 6                | 0              | -4.164960               | -0.948284 | -0.133279 |
| 19               | 6                | 0              | -2.527673               | -0.584913 | 1.625416  |

|    |   |   |           |           |           |
|----|---|---|-----------|-----------|-----------|
| 20 | 6 | 0 | -3.019578 | -1.700239 | 2.347035  |
| 21 | 6 | 0 | -5.770607 | -2.805549 | 0.078093  |
| 22 | 6 | 0 | -6.346709 | -2.451309 | -1.119758 |
| 23 | 6 | 0 | -4.774537 | -0.620414 | -1.375195 |
| 24 | 6 | 0 | -5.838578 | -1.351576 | -1.851855 |
| 25 | 6 | 0 | -4.426734 | 2.409787  | 0.457880  |
| 26 | 6 | 0 | -3.303107 | 4.656728  | -0.788544 |
| 27 | 6 | 0 | -4.497294 | 4.767070  | -0.115068 |
| 28 | 6 | 0 | -5.059444 | 3.631613  | 0.515617  |
| 29 | 6 | 0 | -0.343380 | -0.234764 | 2.745859  |
| 30 | 6 | 0 | 0.598455  | 0.851724  | 3.281161  |
| 31 | 6 | 0 | 2.865239  | 1.514473  | 3.536051  |
| 32 | 6 | 0 | 2.150564  | 2.710295  | 2.871547  |
| 33 | 6 | 0 | 0.686097  | 2.238613  | 2.617473  |
| 34 | 1 | 0 | -2.566041 | -1.963942 | 3.294887  |
| 35 | 1 | 0 | -4.457176 | -3.277028 | 2.386880  |
| 36 | 1 | 0 | -1.553602 | 1.209264  | 1.990439  |
| 37 | 1 | 0 | 0.200960  | 1.972773  | -2.139836 |
| 38 | 1 | 0 | -0.958922 | 4.159392  | -2.033146 |
| 39 | 1 | 0 | -7.188009 | -3.016681 | -1.510025 |
| 40 | 1 | 0 | 1.918804  | -4.090680 | 0.044183  |
| 41 | 1 | 0 | -6.148963 | -3.652020 | 0.645677  |
| 42 | 1 | 0 | -0.779747 | -2.938980 | 0.860280  |
| 43 | 1 | 0 | -6.002638 | 3.724471  | 1.046307  |
| 44 | 1 | 0 | -0.291520 | -4.633157 | 0.817696  |
| 45 | 1 | 0 | -4.375241 | 0.200952  | -1.957990 |
| 46 | 1 | 0 | -1.826084 | -3.696283 | -1.245772 |
| 47 | 1 | 0 | -6.288641 | -1.087666 | -2.804450 |
| 48 | 1 | 0 | -0.423524 | -4.709214 | -1.626232 |
| 49 | 1 | 0 | -4.874342 | 1.547212  | 0.938922  |
| 50 | 1 | 0 | 0.110920  | -2.809879 | -2.926653 |
| 51 | 1 | 0 | -2.862097 | 5.522249  | -1.276676 |
| 52 | 1 | 0 | -5.011816 | 5.722247  | -0.066080 |
| 53 | 1 | 0 | 3.277778  | -1.051834 | -3.407545 |
| 54 | 1 | 0 | 1.544463  | -0.738151 | -3.220593 |
| 55 | 1 | 0 | 4.509729  | -1.962324 | -1.638231 |
| 56 | 1 | 0 | 3.706523  | -2.724620 | -0.181431 |
| 57 | 1 | 0 | 1.574814  | -2.586136 | 0.931493  |



|    |   |   |           |           |           |
|----|---|---|-----------|-----------|-----------|
| 58 | 1 | 0 | 0.395331  | -0.307757 | -0.616656 |
| 59 | 1 | 0 | 0.398580  | 0.961193  | 4.354366  |
| 60 | 1 | 0 | 2.867275  | 1.588968  | 4.626609  |
| 61 | 1 | 0 | 3.878791  | 1.326700  | 3.187302  |
| 62 | 1 | 0 | 2.633886  | 2.971095  | 1.927095  |
| 63 | 1 | 0 | 2.194806  | 3.589242  | 3.518397  |
| 64 | 1 | 0 | 0.496986  | 2.157351  | 1.542936  |
| 65 | 1 | 0 | -0.050633 | 2.924977  | 3.041854  |
| 66 | 1 | 0 | 2.095998  | -2.286583 | -3.871724 |
| 67 | 1 | 0 | 2.208199  | 0.063483  | 2.154459  |
| 68 | 1 | 0 | 2.163136  | -0.498207 | 3.719282  |
| 69 | 7 | 0 | -1.491133 | 0.218864  | 2.191167  |
| 70 | 7 | 0 | -0.533417 | -0.289402 | -1.036806 |
| 71 | 7 | 0 | 2.004429  | 0.344672  | 3.161937  |
| 72 | 7 | 0 | 1.258816  | -2.500488 | -1.172061 |
| 73 | 8 | 0 | -1.942482 | -1.325233 | -2.515437 |
| 74 | 8 | 0 | -0.023640 | -1.411352 | 2.897601  |
| 75 | 6 | 0 | 3.508882  | -0.141031 | -0.046160 |
| 76 | 8 | 0 | 2.347168  | -0.006375 | 0.464258  |
| 77 | 6 | 0 | 4.572837  | -0.647831 | 0.954771  |
| 78 | 8 | 0 | 4.287269  | -0.880562 | 2.117834  |
| 79 | 8 | 0 | 5.803049  | -0.800125 | 0.461159  |
| 80 | 6 | 0 | 6.809311  | -1.272554 | 1.386192  |
| 81 | 1 | 0 | 7.726139  | -1.340307 | 0.802356  |
| 82 | 1 | 0 | 6.527601  | -2.250070 | 1.783555  |
| 83 | 1 | 0 | 6.927170  | -0.564777 | 2.209535  |
| 84 | 6 | 0 | 3.926021  | 0.821029  | -1.136624 |
| 85 | 6 | 0 | 4.550232  | 2.767526  | -3.080174 |
| 86 | 6 | 0 | 3.071689  | 1.911443  | -1.370699 |
| 87 | 6 | 0 | 5.106730  | 0.726834  | -1.895786 |
| 88 | 6 | 0 | 5.410302  | 1.689504  | -2.856985 |
| 89 | 6 | 0 | 3.379522  | 2.875930  | -2.329740 |
| 90 | 1 | 0 | 2.166400  | 1.996759  | -0.781412 |
| 91 | 1 | 0 | 5.795207  | -0.092507 | -1.735386 |
| 92 | 1 | 0 | 6.326008  | 1.596593  | -3.433966 |
| 93 | 1 | 0 | 2.707180  | 3.715255  | -2.485853 |
| 94 | 1 | 0 | 4.793989  | 3.515580  | -3.828939 |

## TS-1b-R

Standard orientation:

| -----  |        |        |                         |           |           |  |
|--------|--------|--------|-------------------------|-----------|-----------|--|
| Center | Atomic | Atomic | Coordinates (Angstroms) |           |           |  |
| Number | Number | Type   | X                       | Y         | Z         |  |
| -----  |        |        |                         |           |           |  |
| 1      | 1      | 0      | -3.451093               | -2.393678 | -0.473640 |  |
| 2      | 1      | 0      | -2.638993               | -3.378085 | 0.665316  |  |
| 3      | 1      | 0      | -1.353547               | 4.114659  | 2.350413  |  |
| 4      | 1      | 0      | -1.214660               | -3.702948 | -2.845786 |  |
| 5      | 1      | 0      | 0.039157                | -4.241763 | -1.723530 |  |
| 6      | 1      | 0      | -2.073171               | -5.897973 | -2.181815 |  |
| 7      | 1      | 0      | -1.546313               | -5.663870 | -0.506357 |  |
| 8      | 1      | 0      | -3.923904               | -5.001724 | -0.390211 |  |
| 9      | 1      | 0      | -3.800190               | -4.135758 | -1.942333 |  |
| 10     | 1      | 0      | -1.488655               | -1.861871 | -1.363377 |  |
| 11     | 1      | 0      | -0.056671               | 1.354632  | -0.615379 |  |
| 12     | 1      | 0      | -1.999954               | 2.725857  | -2.247985 |  |
| 13     | 1      | 0      | -3.847919               | 2.806848  | -0.588888 |  |
| 14     | 1      | 0      | -4.045038               | 2.487653  | 1.197452  |  |
| 15     | 1      | 0      | -0.614043               | 2.526668  | 2.100467  |  |
| 16     | 1      | 0      | -2.272749               | 2.644993  | 2.710423  |  |
| 17     | 1      | 0      | 5.963190                | -3.274571 | -3.433643 |  |
| 18     | 1      | 0      | 4.707003                | -1.478555 | -4.586598 |  |
| 19     | 1      | 0      | 0.247026                | 4.353183  | 0.780174  |  |
| 20     | 1      | 0      | 4.069557                | -2.256193 | 0.284834  |  |
| 21     | 1      | 0      | -0.410396               | 5.986718  | -0.882357 |  |
| 22     | 1      | 0      | 5.628577                | 2.577398  | 2.024442  |  |
| 23     | 1      | 0      | 1.136952                | 5.389296  | -1.524994 |  |
| 24     | 1      | 0      | 4.183064                | 1.528318  | 0.341010  |  |
| 25     | 1      | 0      | -1.076119               | 5.239312  | -3.132551 |  |
| 26     | 1      | 0      | 5.634628                | -3.648208 | -0.991887 |  |
| 27     | 1      | 0      | -0.013499               | 3.834212  | -3.034038 |  |
| 28     | 1      | 0      | 3.890894                | 0.142504  | 5.115637  |  |
| 29     | 1      | 0      | -2.710710               | 4.254747  | -1.698225 |  |

|    |   |   |           |           |           |
|----|---|---|-----------|-----------|-----------|
| 30 | 1 | 0 | 5.495690  | 1.894173  | 4.416783  |
| 31 | 1 | 0 | 3.088272  | 0.371584  | -4.522178 |
| 32 | 1 | 0 | 1.512881  | 1.788873  | -3.250056 |
| 33 | 1 | 0 | 0.663147  | -1.503891 | -0.664788 |
| 34 | 1 | 0 | 2.150097  | -1.503573 | 4.544596  |
| 35 | 1 | 0 | 0.664981  | -2.567441 | 2.880242  |
| 36 | 8 | 0 | -0.898757 | -3.291069 | 1.431232  |
| 37 | 8 | 0 | 2.365213  | 3.430864  | -0.671067 |
| 38 | 7 | 0 | -1.282533 | 3.443238  | -0.380779 |
| 39 | 7 | 0 | -2.792647 | -3.194273 | -0.346612 |
| 40 | 7 | 0 | 0.914825  | 1.665119  | -0.712081 |
| 41 | 7 | 0 | 0.558966  | -1.946078 | 0.242799  |
| 42 | 6 | 0 | -1.021875 | -3.993521 | -1.807882 |
| 43 | 6 | 0 | -1.942664 | -5.154896 | -1.391427 |
| 44 | 6 | 0 | -3.253092 | -4.447676 | -1.049218 |
| 45 | 6 | 0 | -1.414670 | -2.829392 | -0.862773 |
| 46 | 6 | 0 | -0.536273 | -2.713089 | 0.402969  |
| 47 | 6 | 0 | 5.074842  | -2.865783 | -1.496392 |
| 48 | 6 | 0 | 5.263539  | -2.653557 | -2.881844 |
| 49 | 6 | 0 | 4.565657  | -1.656232 | -3.523478 |
| 50 | 6 | 0 | 4.194414  | -2.085841 | -0.778645 |
| 51 | 6 | 0 | 4.931067  | 1.800207  | 2.323100  |
| 52 | 6 | 0 | 4.130600  | 1.204125  | 1.374224  |
| 53 | 6 | 0 | 4.852792  | 1.416163  | 3.683319  |
| 54 | 6 | 0 | 3.961390  | 0.443171  | 4.073224  |
| 55 | 6 | 0 | 1.365346  | -1.798701 | 2.585163  |
| 56 | 6 | 0 | 1.439539  | -1.407934 | 1.222530  |
| 57 | 6 | 0 | 3.201176  | 0.191535  | 1.743064  |
| 58 | 6 | 0 | 3.455131  | -1.046419 | -1.408839 |
| 59 | 6 | 0 | 2.194680  | -1.199076 | 3.501989  |
| 60 | 6 | 0 | 2.356285  | -0.454139 | 0.786071  |
| 61 | 6 | 0 | 2.933804  | 0.205728  | -3.459124 |
| 62 | 6 | 0 | 2.534507  | -0.205943 | -0.682389 |
| 63 | 6 | 0 | 2.058900  | 0.991574  | -2.756007 |
| 64 | 6 | 0 | 3.653863  | -0.832322 | -2.812132 |
| 65 | 6 | 0 | 1.850678  | 0.790816  | -1.364263 |
| 66 | 6 | 0 | 3.116101  | -0.189131 | 3.123656  |
| 67 | 6 | 0 | 0.086402  | 3.979990  | -0.232189 |

|    |   |   |           |           |           |
|----|---|---|-----------|-----------|-----------|
| 68 | 6 | 0 | -0.666745 | 4.490735  | -2.449596 |
| 69 | 6 | 0 | -3.372696 | 2.556337  | 0.349858  |
| 70 | 6 | 0 | -2.092228 | 3.072571  | 0.617044  |
| 71 | 6 | 0 | -1.780501 | 3.679711  | -1.764540 |
| 72 | 6 | 0 | 0.112711  | 5.109034  | -1.278022 |
| 73 | 6 | 0 | 1.234350  | 2.981121  | -0.549574 |
| 74 | 6 | 0 | -1.552325 | 3.086588  | 2.022119  |
| 75 | 8 | 0 | -1.744570 | 0.485532  | -0.607962 |
| 76 | 6 | 0 | -2.897250 | 0.553189  | -0.065581 |
| 77 | 6 | 0 | -3.972582 | 0.150672  | -1.106941 |
| 78 | 8 | 0 | -4.304261 | -1.026536 | -1.240742 |
| 79 | 8 | 0 | -4.368864 | 1.094776  | -1.950355 |
| 80 | 6 | 0 | -5.198912 | 0.668375  | -3.058448 |
| 81 | 1 | 0 | -4.649461 | -0.034797 | -3.687924 |
| 82 | 1 | 0 | -5.432186 | 1.579521  | -3.607199 |
| 83 | 1 | 0 | -6.109172 | 0.194930  | -2.685923 |
| 84 | 6 | 0 | -3.147878 | -0.007694 | 1.317710  |
| 85 | 6 | 0 | -3.548562 | -0.997950 | 3.915860  |
| 86 | 6 | 0 | -2.057207 | -0.281390 | 2.150426  |
| 87 | 6 | 0 | -4.446537 | -0.240748 | 1.800471  |
| 88 | 6 | 0 | -4.644852 | -0.733659 | 3.088609  |
| 89 | 6 | 0 | -2.255778 | -0.771267 | 3.442193  |
| 90 | 1 | 0 | -1.053905 | -0.107565 | 1.777671  |
| 91 | 1 | 0 | -5.308979 | -0.032359 | 1.171948  |
| 92 | 1 | 0 | -5.654638 | -0.908587 | 3.449236  |
| 93 | 1 | 0 | -1.396259 | -0.980018 | 4.072043  |
| 94 | 1 | 0 | -3.704137 | -1.378905 | 4.921061  |

---

## TS-1b-S

Standard orientation:

---

| Center<br>Number | Atomic<br>Number | Atomic<br>Type | Coordinates (Angstroms) |          |          |
|------------------|------------------|----------------|-------------------------|----------|----------|
|                  |                  |                | X                       | Y        | Z        |
| 1                | 1                | 0              | 3.216243                | 2.914584 | 0.942763 |
| 2                | 1                | 0              | 2.054495                | 3.842144 | 1.671654 |

|    |   |   |           |           |           |
|----|---|---|-----------|-----------|-----------|
| 3  | 1 | 0 | 0.428380  | -4.001599 | 2.317407  |
| 4  | 1 | 0 | 1.269044  | 3.772825  | -2.047984 |
| 5  | 1 | 0 | -0.168712 | 4.171994  | -1.104784 |
| 6  | 1 | 0 | 1.793698  | 6.061271  | -1.418575 |
| 7  | 1 | 0 | 1.017894  | 5.882858  | 0.160914  |
| 8  | 1 | 0 | 3.396483  | 5.548630  | 0.727537  |
| 9  | 1 | 0 | 3.651515  | 4.567259  | -0.737836 |
| 10 | 1 | 0 | 1.700964  | 2.068081  | -0.480041 |
| 11 | 1 | 0 | 0.120185  | -1.283892 | -0.626775 |
| 12 | 1 | 0 | 2.487561  | -2.632205 | -1.796400 |
| 13 | 1 | 0 | 3.758702  | -2.776729 | 0.277842  |
| 14 | 1 | 0 | 3.444376  | -2.399683 | 2.027683  |
| 15 | 1 | 0 | -0.056729 | -2.338855 | 1.945938  |
| 16 | 1 | 0 | 1.330809  | -2.639254 | 3.003909  |
| 17 | 1 | 0 | -5.418272 | 3.813823  | -3.575009 |
| 18 | 1 | 0 | -3.971679 | 2.218870  | -4.797478 |
| 19 | 1 | 0 | -0.516686 | -4.374012 | 0.424607  |
| 20 | 1 | 0 | -4.132622 | 2.156668  | 0.174241  |
| 21 | 1 | 0 | 0.512895  | -5.893031 | -1.142701 |
| 22 | 1 | 0 | -5.894470 | -2.878298 | 0.795746  |
| 23 | 1 | 0 | -0.806164 | -5.199750 | -2.111994 |
| 24 | 1 | 0 | -4.216371 | -1.574923 | -0.433819 |
| 25 | 1 | 0 | 1.744933  | -5.000459 | -3.084583 |
| 26 | 1 | 0 | -5.489621 | 3.768515  | -1.084604 |
| 27 | 1 | 0 | 0.719143  | -3.563624 | -3.131687 |
| 28 | 1 | 0 | -4.665535 | -1.070052 | 4.500308  |
| 29 | 1 | 0 | 2.947987  | -4.223578 | -1.162874 |
| 30 | 1 | 0 | -6.132908 | -2.634966 | 3.263820  |
| 31 | 1 | 0 | -2.361888 | 0.361023  | -4.788538 |
| 32 | 1 | 0 | -0.988274 | -1.274144 | -3.536505 |
| 33 | 1 | 0 | -0.523031 | 1.421046  | -0.300491 |
| 34 | 1 | 0 | -2.865944 | 0.611004  | 4.505110  |
| 35 | 1 | 0 | -1.156254 | 1.927004  | 3.303513  |
| 36 | 8 | 0 | 0.398011  | 3.153265  | 2.183740  |
| 37 | 8 | 0 | -2.237118 | -3.304516 | -1.377568 |
| 38 | 7 | 0 | 1.242329  | -3.389662 | -0.245972 |
| 39 | 7 | 0 | 2.486289  | 3.623002  | 0.746582  |
| 40 | 7 | 0 | -0.811759 | -1.571482 | -0.939612 |

|    |   |   |           |           |           |
|----|---|---|-----------|-----------|-----------|
| 41 | 7 | 0 | -0.641938 | 1.777005  | 0.642559  |
| 42 | 6 | 0 | 0.917970  | 4.067622  | -1.054329 |
| 43 | 6 | 0 | 1.616337  | 5.364292  | -0.596276 |
| 44 | 6 | 0 | 2.923034  | 4.864629  | 0.020806  |
| 45 | 6 | 0 | 1.344107  | 2.992114  | -0.017993 |
| 46 | 6 | 0 | 0.292322  | 2.644480  | 1.059970  |
| 47 | 6 | 0 | -4.846627 | 3.073305  | -1.616906 |
| 48 | 6 | 0 | -4.808156 | 3.098973  | -3.030546 |
| 49 | 6 | 0 | -4.004230 | 2.213276  | -3.710883 |
| 50 | 6 | 0 | -4.083570 | 2.170343  | -0.908987 |
| 51 | 6 | 0 | -5.256411 | -2.181031 | 1.330861  |
| 52 | 6 | 0 | -4.325079 | -1.441508 | 0.636447  |
| 53 | 6 | 0 | -5.388912 | -2.047324 | 2.733806  |
| 54 | 6 | 0 | -4.574016 | -1.178243 | 3.422381  |
| 55 | 6 | 0 | -1.792931 | 1.233441  | 2.772012  |
| 56 | 6 | 0 | -1.658410 | 1.095607  | 1.366403  |
| 57 | 6 | 0 | -3.469736 | -0.530538 | 1.317223  |
| 58 | 6 | 0 | -3.240727 | 1.240590  | -1.578882 |
| 59 | 6 | 0 | -2.750102 | 0.500270  | 3.429935  |
| 60 | 6 | 0 | -2.494208 | 0.259267  | 0.630553  |
| 61 | 6 | 0 | -2.379863 | 0.343393  | -3.701912 |
| 62 | 6 | 0 | -2.438521 | 0.276516  | -0.868772 |
| 63 | 6 | 0 | -1.617062 | -0.562150 | -3.011461 |
| 64 | 6 | 0 | -3.207805 | 1.267827  | -3.012005 |
| 65 | 6 | 0 | -1.639347 | -0.597534 | -1.591631 |
| 66 | 6 | 0 | -3.597844 | -0.404641 | 2.740755  |
| 67 | 6 | 0 | -0.114708 | -3.925001 | -0.485140 |
| 68 | 6 | 0 | 1.187448  | -4.294761 | -2.463824 |
| 69 | 6 | 0 | 3.038031  | -2.466318 | 1.024426  |
| 70 | 6 | 0 | 1.730895  | -2.991629 | 0.931374  |
| 71 | 6 | 0 | 2.099717  | -3.590444 | -1.448038 |
| 72 | 6 | 0 | 0.122418  | -4.971271 | -1.588048 |
| 73 | 6 | 0 | -1.159891 | -2.887653 | -0.974973 |
| 74 | 6 | 0 | 0.806462  | -2.991975 | 2.118611  |
| 75 | 8 | 0 | 1.709428  | -0.306614 | -0.184710 |
| 76 | 6 | 0 | 2.824691  | -0.489448 | 0.413402  |
| 77 | 6 | 0 | 2.880837  | 0.244253  | 1.776877  |
| 78 | 8 | 0 | 3.410052  | 1.346148  | 1.889911  |

|    |   |   |          |           |           |
|----|---|---|----------|-----------|-----------|
| 79 | 8 | 0 | 2.195669 | -0.316023 | 2.766097  |
| 80 | 6 | 0 | 2.064422 | 0.460882  | 3.983151  |
| 81 | 1 | 0 | 3.050361 | 0.657281  | 4.409437  |
| 82 | 1 | 0 | 1.469946 | -0.159063 | 4.652901  |
| 83 | 1 | 0 | 1.555236 | 1.402496  | 3.770669  |
| 84 | 6 | 0 | 4.107322 | -0.345385 | -0.387333 |
| 85 | 6 | 0 | 6.418914 | -0.064361 | -1.956190 |
| 86 | 6 | 0 | 5.378502 | -0.406238 | 0.201613  |
| 87 | 6 | 0 | 4.008440 | -0.135929 | -1.768056 |
| 88 | 6 | 0 | 5.157047 | 0.002168  | -2.549325 |
| 89 | 6 | 0 | 6.525774 | -0.267061 | -0.576939 |
| 90 | 1 | 0 | 5.476717 | -0.561486 | 1.273210  |
| 91 | 1 | 0 | 3.019559 | -0.080222 | -2.212996 |
| 92 | 1 | 0 | 5.066949 | 0.162255  | -3.620527 |
| 93 | 1 | 0 | 7.504700 | -0.317235 | -0.108509 |
| 94 | 1 | 0 | 7.314393 | 0.040490  | -2.562083 |

---

## References

- <sup>1</sup> a) G. Guillena, M. C. Hita, C. Nájera, S. F. Vióquez *J. Org. Chem.* **2008**, *73*, 5933; b) S. F. Vióquez, G. Guillena, C. Nájera, B. Bradshaw, G. Etxebarria-Jardi, J. Bonjoch, *Org. Synth.* **2011**, *88*, 317.
- <sup>2</sup> Z. Jiang, Y. Lu *Tetrahedron Lett.* **2010**, *51*, 1884.
- <sup>3</sup> M. Raj, G. S. Parashari, V. K. Singh *Adv. Synth. Catal.* 2009, **351**, 1284.
- <sup>4</sup> F. Wang, Y. Xiong, X. Liu, X. Feng, *Adv. Synth. Catal.* **2007**, *349*, 2665.

<sup>5</sup> a) C.Lee, W. Yang, R. G. Parr, *Phys. Rev. B* **1988**, *37*, 785; b) A. D. Becke, *J. Chem. Phys.* **1993**, *98*, 5648; c) W. Kohn, A. D. Becke, R. G. Parr, *J. Phys. Chem.* **1996**, *100*, 12974.

<sup>6</sup> M. J. Frisch, G. W. Trucks, H. B. Schlegel, G. E. Scuseria, M. A. Robb, J. R. Cheeseman, G. Scalmani, V. Barone, B. Mennucci, G. A. Petersson, H. Nakatsuji, M. Caricato, X. Li, H. P. Hratchian, A. F. Izmaylov, J. Bloino, G. Zheng, J. L. Sonnenberg, M. Hada, M. Ehara, K. Toyota, R. Fukuda, J. Hasegawa, M. Ishida, T. Nakajima, Y. Honda, O. Kitao, H. Nakai, T. Vreven, J. A., Jr. Montgomery, J. E. Peralta, F. Ogliaro, M. Bearpark, J. J. Heyd., E. Brothers, K. N. Kudin., V. N Staroverov, R. Kobayashi, J. Normand, K. Raghavachari, A. Rendell, J. C. Burant, S. S. Iyengar, J. Tomasi, M. Cossi, N. Rega, J. M. Millam, M. Klene, J. E. Knox, J. B. Cross, V. Bakken, C. Adamo, J. Jaramillo, R. Gomperts, R. E. Stratmann, O. Yazyev, A. J. Austin, R. Cammi, C. Pomelli, J. W. Ochterski, R. L. Martin, K. Morokuma, V. G. Zakrewski, G. A. Voth, P. Salvador, J. J. Dannenberg, S. Dapprich, A. D. Daniels, O. Farkas, J. B. Foresman, J. V. Ortiz, J. Cioslowski, D. J. Fox, Gaussian 09, Revision A.02, Gaussian, Inc., Wallingford CT, **2009**.

<sup>7</sup> a) E. Cancès, B. Mennucci, J. Tomasi, *J. Chem. Phys.* **1997**, *107*, 3032. (b) J. Tomasi, B. Mennucci, E. Cancès, *J. Mol. Struct. (Theochem)* **1999**, *464*, 211.

<sup>8</sup> C. Gonzalez, H. B. Schlegel, *J. Phys. Chem.* **1990**, *94*, 5523.
